# Supplementary material for: Silica-supported Nb(iii)–CH3 species can act as an efficient catalyst for the non-oxidative coupling of methane
Source: Royal Society of Chemistry journal article supplement (doi:10.1039/d1nj01039e), 2021-01-01
Supplement: d1nj01039e1.pdf [file d1nj01039e1.pdf]

## Supporting Information

### Silica-Supported Nb(III)-CH<sub>3</sub> Species can Act as an Efficient Catalyst for Non-Oxidative Coupling of Methane

Xufeng Lin<sup>[a]†\*</sup>, Lishuang Ma<sup>[a]†</sup>, Shidong Zhao<sup>[a]</sup>, Yanyan Xi<sup>[b]</sup>, Hongyan Shang<sup>[a]</sup>, Gaojun An<sup>[c]</sup> and  
Changbo Lu<sup>[c]</sup>

† These authors contributed equally to this work.

\*Authors to whom correspondence should be addressed via [hattrick2009@upc.edu.cn](mailto:hattrick2009@upc.edu.cn);

1. The absolute electronic energies (E+ZPE, Hartree), the thermal enthalpies (H, Hartree) and free energies (G, Hartree) with zero-point correction at 723 K and 49.3 atm/50.0 bar, as well as the imaginary frequencies (I.F.,  $\text{cm}^{-1}$ ), calculated at the B3LYP/BS-1 level of theory.

| Species                                        | E+ZPE        | H<br>(723.15 K, 49.3 atm) | G<br>(723.15 K, 49.3 atm) |
|------------------------------------------------|--------------|---------------------------|---------------------------|
| Methane                                        | -40.489162   | -40.477852                | -40.531064                |
| Hydrogen                                       | -1.169509    | -1.161491                 | -1.195557                 |
| Ethane                                         | -79.781879   | -79.765009                | -79.836628                |
| CA0 (= CB3)                                    | -1682.749274 | -1682.668232              | -1722.250790              |
| CB0                                            | -1682.749274 | -1682.668232              | -1682.921895              |
| CA[0-1] <sup>≠</sup> (= CB[3-4] <sup>≠</sup> ) | -1762.539946 | -1762.441139              | -1762.732019              |
| CA1 (= CB4)                                    | -1762.572230 | -1762.474129              | -1762.760269              |
| CA[1-2] <sup>≠</sup>                           | -1762.533562 | -1762.433219              | -1762.728465              |
| CA2                                            | -1761.394264 | -1761.297302              | -1761.581702              |
| CA[2-3] <sup>≠</sup>                           | -1761.330751 | -1761.236801              | -1761.515197              |
| CA3                                            | -1761.360476 | -1761.265115              | -1761.553779              |
| CA[3-4] <sup>≠</sup>                           | -1801.827211 | -1801.722359              | -1802.024831              |
| CA4                                            | -1801.873658 | -1801.766575              | -1802.074069              |
| CA[4-0] <sup>≠</sup>                           | -1801.829365 | -1801.724730              | -1802.026310              |
| CA[2-5] <sup>≠</sup>                           | -1801.818198 | -1801.710573              | -1802.016601              |
| CA5                                            | -1801.879003 | -1801.769976              | -1802.081919              |
| CA[5-4] <sup>≠</sup>                           | -1801.793474 | -1801.686042              | -1801.992049              |
| CA[2-6] <sup>≠</sup>                           | -1761.333259 | -1761.238678              | 1761.516803               |
| CA6                                            | -1720.836621 | -1720.753825              | -1721.004847              |
| CA[6-7] <sup>≠</sup>                           | -1761.286543 | -1761.191855              | -1761.471173              |

|          |              |              |              |
|----------|--------------|--------------|--------------|
| CA7      | -1761.385675 | -1761.290577 | -1761.571510 |
| CA[7-3]≠ | -1761.355825 | -1761.262376 | -1761.540794 |
| CB[0-1]≠ | -1723.237100 | -1723.145430 | -1723.421327 |
| CB1      | -1723.275968 | -1723.183583 | -1723.456690 |
| CB[1-2]≠ | -1723.226538 | 1723.134514  | -1723.409465 |
| CB2      | -1722.086584 | -1721.998044 | -1722.262693 |
| CB[2-3]≠ | -1722.056879 | -1721.969755 | -1722.235593 |
| CB[4-5]≠ | -1762.490320 | -1762.390859 | -1762.678265 |
| CB5      | -1762.554479 | -1762.455569 | -1762.746045 |
| CB[5-0]≠ | -1762.530564 | -1762.432491 | -1762.725338 |
| CB[2-4]≠ | -1762.510912 | -1762.411484 | -1762.698738 |
| CA[2-5]≠ | -1762.464664 | -1762.365523 | -1762.653141 |

---

## 2. Details of the refined single-point-energy calculations

To inspect the functional and basis set effects on the free energies, the energies of critical points in the catalytic cycle A were refined with the B3LYP functional including empirical dispersion correction computed with Grimme's D3 formula (B3LYP-D3). And larger basis set def2-TZVPP was applied for all atoms except the metal atoms, which were described by the energy-consistent scalar-relativistic DF-adjusted 10-electron-core pseudopotential/ECP10MDF(8s7p6d2f1g)/[6s5p3d2f1g] for V, WB-adjusted 28-electron-core pseudopotential/ECP28MDF(10s9p8d2f1g)/[5s5p4d2f1g] for Nb, and WB-adjusted 60-electron-core pseudopotential/ECP60MWB(10s9p8d2f1g)/[5s5p4d2f1g] for Ta, respectively. These combined basis sets are denoted as BS-2.

The absolute calculated electronic energies ( $E_{\text{BS-2}}$ , Hartree) calculated at B3LYP-D3/BS-2 level of theory, the thermal correction to Gibbs free energy ( $G_{\text{corr}}$ , Hartree) obtained at B3LYP/BS-1 level of theory, as well as the corrected free energies ( $G_{\text{BS-2}}$ , Hartree) at 723 K and 49.3 atm/50.0 bar are summarized as following.

| Nb(III)              | $E_{\text{BS-2}}$ | $G_{\text{corr}}$<br>(723.15 K, 49.3 atm) | $G_{\text{BS-2}}$<br>(723.15 K, 49.3 atm) |
|----------------------|-------------------|-------------------------------------------|-------------------------------------------|
| Methane              | -40.539266        | 0.002685                                  | -40.536581                                |
| Hydrogen             | -1.180003         | -0.015986                                 | -1.195989                                 |
| Ethane               | -79.868025        | 0.019631                                  | -79.848394                                |
| CA0                  | -1722.271461      | -0.040557                                 | -1722.312018                              |
| CA[0-1] <sup>≠</sup> | -1762.797036      | -0.005347                                 | -1762.802383                              |
| CA1                  | -1762.835051      | -0.001167                                 | -1762.836218                              |
| CA[1-2] <sup>≠</sup> | -1762.788838      | -0.013913                                 | -1762.802751                              |

|              |              |              |              |
|--------------|--------------|--------------|--------------|
| CA2          | -1761.631376 | -0.020834    | -1761.652210 |
| CA[2-3]≠     | -1761.569007 | -0.015720    | -1761.584727 |
| CA3          | -1761.597432 | -0.023154    | -1761.620586 |
| CA[3-4]≠     | -1802.123496 | 0.019868     | -1802.103628 |
| CA4          | -1802.170421 | 0.015258     | -1802.155163 |
| CA[4-0]≠     | -1802.125875 | 0.021051     | -1802.104824 |
| CA0 (V)      | -1737.143750 | -0.036347    | -1737.180097 |
| CA[3-4]≠(V)  | -1816.990156 | 0.020626     | -1816.969530 |
| CA0 (Ta)     | -0.044017    | -1722.974579 | -1723.018596 |
| CA[3-4]≠(Ta) | 0.015152     | -1802.814904 | -1802.799752 |

---

### 3. Schematic orbital diagrams

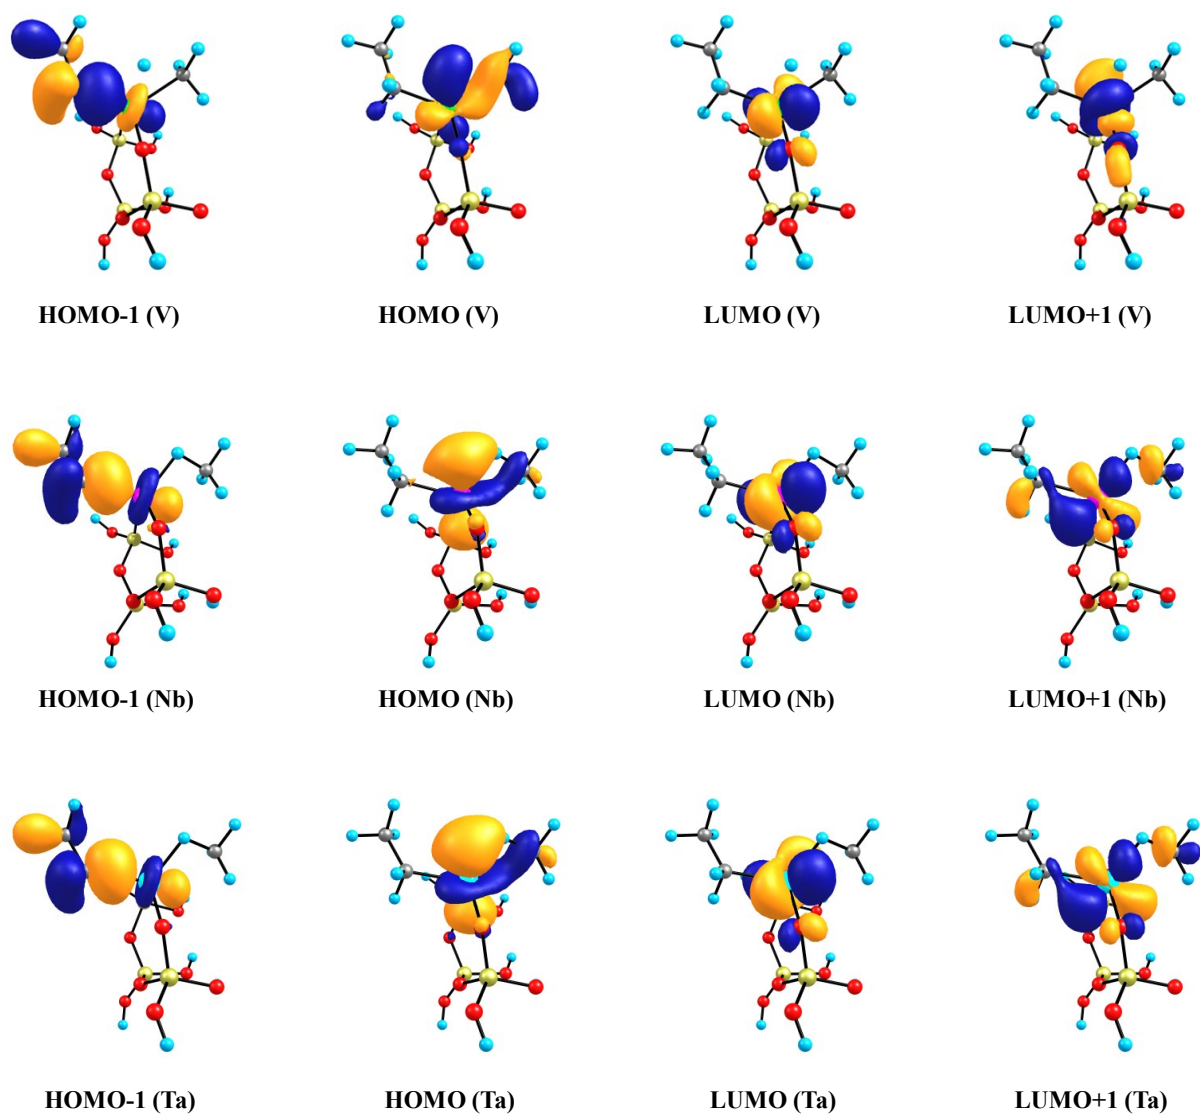

**Figure S1.** The diagram of frontier orbitals of the transition state  $CA[3-4]^{\ddagger}$  for the  $M(III)$ - $CH_3$  catalyzed systems.

#### 4. Supplementary data for the $\text{Si}_9\text{O}_{24}\text{H}_{10}$ supported systems

To know whether the smaller model including 3 Si atoms is representative for a catalytic support of silica in this study. Some critical points, i.e., **CA0**, **CA3** and **CA[3-4]**<sup>≠</sup> for the M(III)-catalyzed (where M = V, Nb, and Ta) non-oxidative coupling of methane were examined by using a larger  $\text{Si}_9\text{O}_{24}\text{H}_{10}$  cluster model. As shown in Figure S2, the same the basis set was used for the reaction center as that by using the smaller  $\text{Si}_3\text{O}_{10}\text{H}_6$  cluster model, that is, the 6-311G(d,p) was used for the C, H, O, and Si atoms, and SDD was used for V, Nb, and Ta atoms. While a smaller 6-31G(d) basis set was applied to the remaining atoms away from the reaction center, as illustrated in Figure S1. This combination of the mixed basis set applied for the  $\text{Si}_9\text{O}_{24}\text{H}_{10}$  supported systems is denoted as BS-3. The optimized structures are schematically summarized in Figure S3.

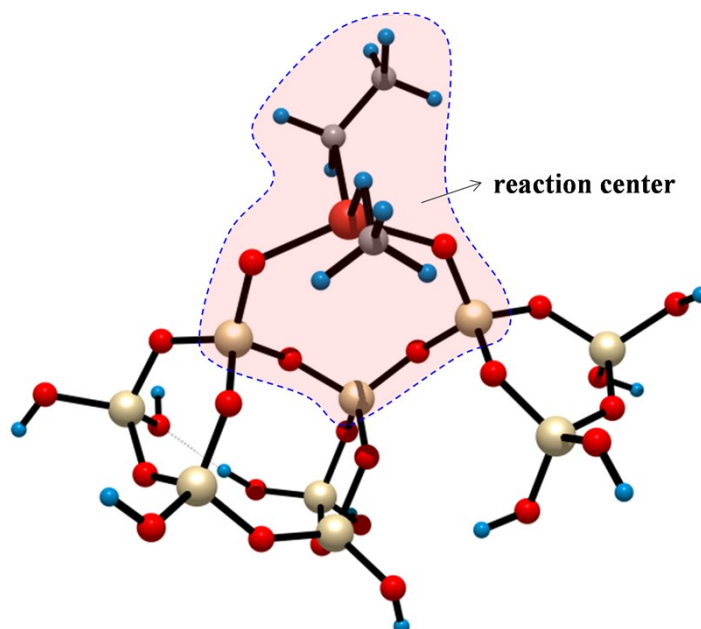

**Figure S2.** Schematic illustration of the mixed basis sets (BS-3) used for the calculations by using the larger  $\text{Si}_9\text{O}_{24}\text{H}_{10}$  cluster.

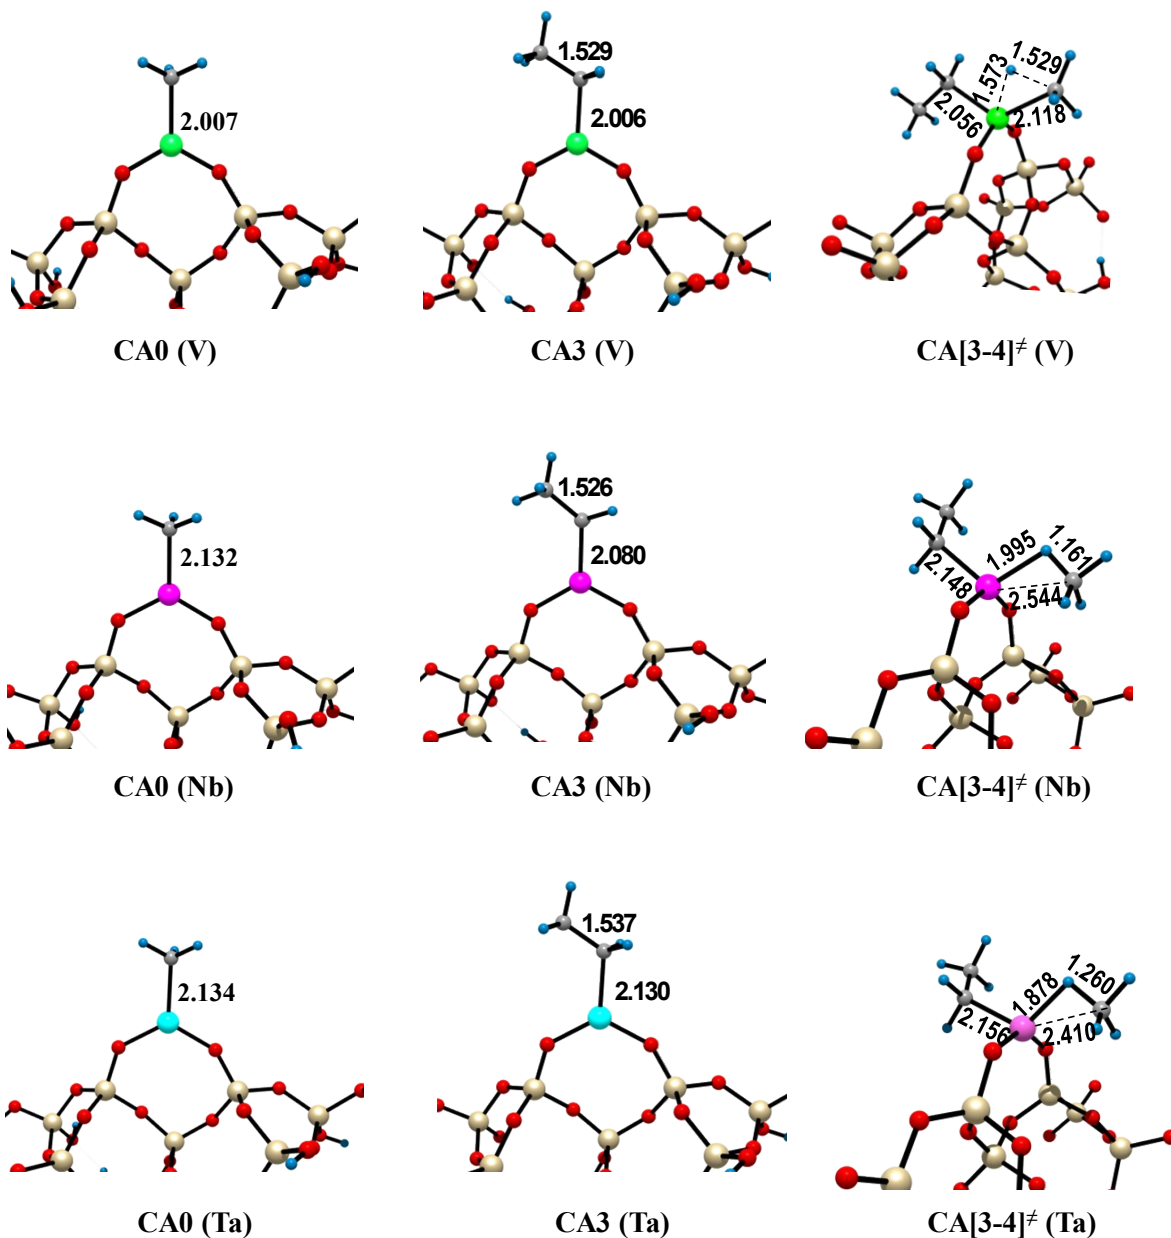

**Figure S3.** Schematically critical points with the key bond lengths/distances (Å) for M(III)-catalyzed (where M = V, Nb, and Ta) non-oxidative coupling of methane calculated by using the larger  $\text{Si}_9\text{O}_{24}\text{H}_{10}$  cluster model.



**5. The absolute electronic energies (E+ZPE, Hartree), the thermal enthalpies (H, Hartree) and free energies (G, Hartree) with zero-point correction at 723 K and 49.3 atm/50.0 bar, as well as the imaginary frequencies (I.F., cm<sup>-1</sup>) for the Si<sub>9</sub>O<sub>24</sub>H<sub>10</sub> supported systems, calculated at the B3LYP/BS-3 level of theory.**

| <b>Species</b>            | <b>E+ZPE</b> | <b>H</b><br>(723.15 K, 49.3 atm) | <b>G</b><br>(723.15 K, 49.3 atm) |
|---------------------------|--------------|----------------------------------|----------------------------------|
| CA0 (Nb)                  | -4515.528082 | -4515.345246                     | -4515.839613                     |
| CA3 (Nb)                  | -4554.823557 | -4554.634754                     | -4555.141557                     |
| CA[3-4] <sup>≠</sup> (Nb) | -4595.290724 | -4595.091499                     | -4595.616177                     |
| CA0 (V)                   | -4530.240701 | -4530.058775                     | -4530.548569                     |
| CA3 (V)                   | -4569.533304 | -4569.347134                     | -4569.843038                     |
| CA[3-4] <sup>≠</sup> (V)  | -4609.991986 | -4609.792567                     | -4610.317676                     |
| CA0 (Ta)                  | -4515.586646 | -4515.404131                     | -4515.898099                     |
| CA3 (Ta)                  | -4554.877525 | -4554.688560                     | -4555.197378                     |
| CA[3-4] <sup>≠</sup> (Ta) | -4595.335014 | -4595.135214                     | -4595.663123                     |

**6. Cartesian coordinates of all the optimized structures obtained at the B3LYP/6-311G(d,p) level of theory.**

|                    |             |             |             |                              |             |             |             |
|--------------------|-------------|-------------|-------------|------------------------------|-------------|-------------|-------------|
| <b>Methane</b>     |             |             |             | H                            | 1.80959900  | 1.30047600  | 1.94464900  |
| C                  | 0.00006000  | 0.00007400  | -0.00002800 | H                            | 4.29383000  | 0.59030500  | -0.90268800 |
| H                  | -0.21376600 | -0.47016500 | 0.96070700  | C                            | -3.94242200 | -1.25236800 | 0.31065200  |
| H                  | -0.26477600 | -0.68496600 | -0.80649100 | H                            | -4.57072100 | -0.51469000 | 0.81807600  |
| H                  | 1.06266900  | 0.23861100  | -0.05962600 | H                            | -4.35743300 | -1.43784700 | -0.69744400 |
| H                  | -0.58448500 | 0.91607600  | -0.09442400 | H                            | -3.95141900 | -2.19186300 | 0.87063600  |
| <b>Hydrogen</b>    |             |             |             | <b>CB0</b>                   |             |             |             |
| H                  | 0.00000000  | 0.00000000  | 0.37208700  | Si                           | 2.48235400  | 0.22792300  | -0.09232300 |
| H                  | 0.00000000  | 0.00000000  | -0.37208700 | O                            | 1.60131200  | -1.18334100 | 0.00362000  |
| <b>Ethane</b>      |             |             |             | Nb                           | 0.02471600  | -2.21989700 | 0.07172900  |
| C                  | 0.00000000  | 0.00000000  | 0.76476700  | O                            | -1.71002000 | -1.42862000 | 0.02042700  |
| H                  | 0.00000000  | 1.01833500  | 1.16356900  | Si                           | -2.39264300 | 0.07234400  | -0.15381500 |
| H                  | 0.88190400  | -0.50916700 | 1.16356900  | O                            | -3.64990600 | -0.00154000 | -1.19168400 |
| H                  | -0.88190400 | -0.50916700 | 1.16356900  | O                            | -2.93208200 | 0.67769800  | 1.27769900  |
| C                  | 0.00000000  | 0.00000000  | -0.76476700 | O                            | -1.19622400 | 1.07754400  | -0.62400600 |
| H                  | 0.00000000  | -1.01833500 | -1.16356900 | O                            | 3.50082000  | 0.30476100  | 1.18817600  |
| H                  | -0.88190400 | 0.50916700  | -1.16356900 | O                            | 3.37643800  | 0.27448600  | -1.45552100 |
| H                  | 0.88190400  | 0.50916700  | -1.16356900 | O                            | 1.42919900  | 1.46649200  | -0.15313200 |
| <b>CA0 (= CB3)</b> |             |             |             | H                            | 0.17637800  | -3.98746300 | 0.30077700  |
| Si                 | 1.05484900  | -2.19844700 | -0.03067000 | H                            | 4.18581100  | -0.24057200 | -1.47542800 |
| O                  | -0.54756300 | -1.80679200 | -0.11830500 | H                            | 3.14190700  | 0.20578500  | 2.07299000  |
| Nb                 | -1.96929100 | -0.55372100 | -0.12781800 | H                            | -3.54134400 | -0.46654500 | -2.02442000 |
| O                  | -1.61309100 | 1.33243800  | -0.09574000 | H                            | -3.73903900 | 0.32590600  | 1.66045700  |
| Si                 | -0.34538300 | 2.38826200  | -0.03982500 | Si                           | -0.06995100 | 2.09595100  | 0.00880100  |
| O                  | -0.72348600 | 3.76592400  | -0.83048700 | O                            | -0.34539400 | 2.25615900  | 1.62039100  |
| O                  | 0.08160100  | 2.76427600  | 1.50732600  | O                            | -0.17736800 | 3.48577800  | -0.84241400 |
| O                  | 0.97075500  | 1.63071800  | -0.64829900 | H                            | -1.25288400 | 2.10350300  | 1.91002300  |
| O                  | 1.55819600  | -2.44378800 | 1.51004600  | H                            | 0.56496900  | 4.09279700  | -0.81100300 |
| O                  | 1.25486600  | -3.55418000 | -0.91279400 | <b>CA[0-1]# (= CB[3-4]#)</b> |             |             |             |
| O                  | 1.90188700  | -0.92390600 | -0.66294400 | Si                           | -0.64975800 | 2.40600400  | 0.06455400  |
| H                  | 2.05421200  | -4.06497400 | -0.77022000 | O                            | 0.80063900  | 1.63482700  | 0.14501300  |
| H                  | 1.81291100  | -1.63594000 | 1.97561800  | Nb                           | 1.83785000  | 0.02224500  | 0.11285400  |
| H                  | -1.16258400 | 3.70190900  | -1.68172200 | O                            | 1.09529400  | -1.77458200 | 0.20429500  |
| H                  | -0.50771700 | 3.31152800  | 2.03151900  | Si                           | -0.41042200 | -2.41900500 | 0.07485700  |
| Si                 | 2.16676500  | 0.61695600  | -0.17609900 | O                            | -0.36237100 | -3.86249300 | -0.69039000 |
| O                  | 2.15554700  | 0.52742400  | 1.48069500  | O                            | -1.14715100 | -2.63634900 | 1.53823700  |
| O                  | 3.54973300  | 1.19076700  | -0.82443200 | O                            | -1.35323600 | -1.30816000 | -0.67841800 |
|                    |             |             |             | O                            | -1.27752100 | 2.74581600  | 1.54347000  |

|                    |             |             |             |                 |             |             |             |
|--------------------|-------------|-------------|-------------|-----------------|-------------|-------------|-------------|
| O                  | -0.41949500 | 3.78751800  | -0.77211600 | H               | -0.03363400 | 0.39072100  | -1.10536000 |
| O                  | -1.69834600 | 1.38558400  | -0.71817300 | H               | -1.03124100 | 2.14750900  | 2.50866200  |
| C                  | 4.18958600  | 0.36754800  | 0.74028800  | H               | -0.17332300 | 0.58070800  | 2.49795100  |
| H                  | -1.09103700 | 4.46835700  | -0.69518700 | H               | 0.76202600  | 2.09887500  | 2.54881900  |
| H                  | -1.79670600 | 2.02551400  | 1.92500400  | H               | -0.13889000 | 3.62917900  | -1.95552600 |
| H                  | 0.25153100  | -3.96881200 | -1.42069500 | H               | -1.08872800 | 4.22240700  | -0.56920000 |
| H                  | -0.88626600 | -3.38744000 | 2.07622500  | H               | 0.69528700  | 4.30079300  | -0.53326100 |
| Si                 | -2.35998200 | -0.06187600 | -0.33625300 |                 |             |             |             |
| O                  | -2.56759900 | 0.00239400  | 1.30935200  | <b>CA[1-2]#</b> |             |             |             |
| O                  | -3.72815700 | -0.30954500 | -1.19097100 | Si              | 0.17383700  | 2.37378200  | -0.18850600 |
| H                  | -2.48185200 | -0.83982900 | 1.77527200  | O               | -0.94823400 | 1.20857400  | -0.31295700 |
| H                  | -4.30573100 | 0.44137600  | -1.34266400 | Nb              | -2.09109800 | -0.36158900 | -0.02238900 |
| H                  | 3.10299800  | 0.19726500  | 1.40765800  | O               | -0.68287500 | -1.67268900 | -0.07620000 |
| C                  | 2.85801500  | 0.02547500  | -1.83402100 | Si              | 0.85086800  | -2.23798700 | -0.03998600 |
| H                  | 3.89010900  | -0.34563900 | -1.87677100 | O               | 1.37687100  | -2.63313800 | 1.46555500  |
| H                  | 2.26847800  | -0.48653600 | -2.60416600 | O               | 0.89322500  | -3.56141200 | -0.99992600 |
| H                  | 2.88858000  | 1.08809200  | -2.11817200 | O               | 1.83201100  | -1.03946100 | -0.62873300 |
| H                  | 4.60514700  | -0.50216600 | 0.23137400  | O               | 0.10410700  | 3.50146600  | -1.38353300 |
| H                  | 4.33471400  | 1.25889500  | 0.12795400  | O               | -0.04225400 | 3.17348300  | 1.22988300  |
| H                  | 4.72837300  | 0.50893800  | 1.68296900  | O               | 1.66162700  | 1.66151500  | -0.24332100 |
|                    |             |             |             | C               | -2.99512200 | 0.70012000  | 1.66706000  |
| <b>CA1 (= CB4)</b> |             |             |             | H               | -3.03609300 | -1.69905200 | 0.91148700  |
| C                  | -0.16596600 | 3.70824200  | -0.86092400 | C               | -3.50998000 | -0.78240700 | -1.35673400 |
| Nb                 | -0.09427100 | 1.73767700  | -0.00614300 | H               | 0.20517600  | 4.10072700  | 1.23926800  |
| O                  | -1.95679500 | 1.10441900  | -0.02532400 | H               | 0.50408700  | 3.28107500  | -2.22746700 |
| Si                 | -2.42689500 | -0.47492500 | -0.09553200 | H               | 1.87178400  | -1.93028800 | 1.90925100  |
| O                  | -1.25508200 | -1.38324200 | 0.61333100  | H               | 1.55517400  | -4.22298000 | -0.78894300 |
| Si                 | 0.13053500  | -2.17691100 | 0.24019100  | Si              | 2.54255200  | 0.31231800  | -0.05101600 |
| O                  | 0.10876100  | -3.56573800 | 1.10148900  | O               | 3.96251400  | 0.59732000  | -0.81603200 |
| O                  | 1.78100100  | 1.26917300  | 0.02013900  | O               | 2.72815000  | -0.03343300 | 1.56785000  |
| Si                 | 2.48591800  | -0.22374900 | -0.10637900 | H               | 4.50640400  | -0.16644600 | -1.02056900 |
| O                  | 1.47357400  | -1.31696600 | 0.62874300  | H               | 2.98688000  | 0.67803700  | 2.15880800  |
| O                  | 2.72009200  | -0.71831800 | -1.65429800 | H               | -3.54035100 | -1.58175700 | -0.02082600 |
| O                  | 3.91949100  | -0.11845100 | 0.66963000  | H               | -4.44016800 | -0.20745300 | -1.34564900 |
| O                  | -3.89368100 | -0.65529000 | 0.60934600  | H               | -3.47575400 | -1.53416600 | -2.14389400 |
| O                  | -2.53196700 | -1.08462000 | -1.62788900 | H               | -3.95939800 | 0.28868500  | 1.97639600  |
| O                  | 0.20314100  | -2.40471900 | -1.40100000 | H               | -2.31905100 | 0.67213500  | 2.52832800  |
| C                  | -0.13900600 | 1.61837800  | 2.15654600  | H               | -3.11580100 | 1.74900300  | 1.37221000  |
| H                  | 4.58938900  | -0.76604100 | 0.44121500  |                 |             |             |             |
| H                  | 2.00640900  | -1.27144100 | -2.00171600 | <b>CA2</b>      |             |             |             |
| H                  | -4.08987200 | -0.12106800 | 1.38216400  | Si              | 0.99922400  | -2.26412100 | -0.04495300 |
| H                  | -3.32114600 | -0.89527700 | -2.14042900 | O               | -0.56808800 | -1.76277200 | -0.12197500 |
| H                  | -0.63094900 | -2.27160200 | -1.87097600 | Nb              | -1.89452900 | -0.38469700 | -0.12538700 |
| H                  | 0.94752900  | -4.00103100 | 1.26651400  | O               | -1.42330800 | 1.49833000  | -0.13505500 |

|                            |             |             |             |                            |             |             |             |
|----------------------------|-------------|-------------|-------------|----------------------------|-------------|-------------|-------------|
| Si                         | -0.07288700 | 2.43558600  | -0.06305500 | H                          | 4.44137400  | -0.56398100 | -0.93578900 |
| O                          | -0.31430600 | 3.85919400  | -0.82592000 | C                          | -3.70953700 | -0.12660600 | -0.89026600 |
| O                          | 0.38926900  | 2.74925500  | 1.49173800  | H                          | -4.15692200 | -1.07046700 | -1.19969400 |
| O                          | 1.17054600  | 1.56495400  | -0.68030900 | C                          | -3.99890400 | -0.19323300 | 1.07110600  |
| O                          | 1.49440300  | -2.54396400 | 1.49476500  | H                          | -4.32336200 | 0.73112000  | -1.16227400 |
| O                          | 1.11333300  | -3.63102800 | -0.92543300 | H                          | -5.04969300 | -0.28928000 | 0.79710000  |
| O                          | 1.92990700  | -1.04753000 | -0.68074100 | H                          | -3.72266400 | -1.07566200 | 1.64847300  |
| H                          | 1.85316200  | -4.21526500 | -0.74777900 | H                          | -3.89229000 | 0.70269500  | 1.68294200  |
| H                          | 1.81819800  | -1.75904600 | 1.95604700  |                            |             |             |             |
| H                          | -0.80634100 | 3.86165700  | -1.65010700 | <b>CA3</b>                 |             |             |             |
| H                          | -0.08754000 | 3.41838800  | 1.98838300  | Si                         | -0.21567400 | 2.42574800  | -0.14210300 |
| Si                         | 2.29086800  | 0.47303700  | -0.19484800 | O                          | 1.09920700  | 1.43455600  | -0.19051500 |
| O                          | 2.24480900  | 0.38723100  | 1.46287100  | Nb                         | 1.79480300  | -0.33425000 | -0.27108200 |
| O                          | 3.71903000  | 0.95155700  | -0.82150900 | O                          | 0.64409700  | -1.86093200 | -0.22230300 |
| H                          | 1.96992100  | 1.19245900  | 1.92051200  | Si                         | -0.90480000 | -2.40360900 | -0.02519300 |
| H                          | 4.41678700  | 0.29826000  | -0.90422500 | O                          | -1.21458900 | -3.57030400 | -1.13177400 |
| C                          | -3.29274800 | -0.75886500 | -1.39764800 | O                          | -1.16409900 | -3.02409200 | 1.46717700  |
| H                          | -3.46479000 | -1.74272000 | -1.83659100 | O                          | -1.90862400 | -1.12526000 | -0.16523200 |
| C                          | -2.98157100 | -0.64823000 | 1.74925500  | O                          | -0.52396500 | 3.01777800  | 1.35567800  |
| H                          | -3.96147700 | 0.02384300  | -1.76275000 | O                          | 0.07506700  | 3.65409200  | -1.17601900 |
| H                          | -3.36205400 | -1.66955100 | 1.83927400  | O                          | -1.51659800 | 1.51818200  | -0.62213200 |
| H                          | -2.30292400 | -0.44836400 | 2.58878300  | C                          | 3.81297700  | -0.67148400 | 0.18945600  |
| H                          | -3.83696800 | 0.03063900  | 1.81222400  | H                          | -0.39621900 | 4.47592000  | -1.02521100 |
|                            |             |             |             | H                          | -1.11560400 | 2.46842800  | 1.88742200  |
| <b>CA[2-3]<sup>≠</sup></b> |             |             |             | H                          | -0.93097700 | -3.42055600 | -2.03655700 |
| Si                         | 0.60145800  | -2.40268100 | -0.02145100 | H                          | -0.76033900 | -3.86961400 | 1.67469000  |
| O                          | -0.83910400 | -1.61031800 | -0.08412800 | Si                         | -2.48093100 | 0.37866700  | 0.04379400  |
| Nb                         | -1.86789300 | -0.00254900 | -0.14507300 | O                          | -2.47545900 | 0.77734600  | 1.65687700  |
| O                          | -1.03451100 | 1.74268100  | -0.04369300 | O                          | -3.96699000 | 0.40101600  | -0.63677000 |
| Si                         | 0.46766500  | 2.41096800  | -0.02730300 | H                          | -2.80936800 | 0.13145900  | 2.28525400  |
| O                          | 0.47248400  | 3.83821300  | -0.82490000 | H                          | -4.34555000 | 1.25922700  | -0.83949300 |
| O                          | 1.02486600  | 2.67351100  | 1.50513200  | H                          | 3.93791000  | -1.68543200 | 0.58764100  |
| O                          | 1.51712500  | 1.31852900  | -0.65077700 | H                          | 3.94976100  | -0.76545000 | -0.93441400 |
| O                          | 1.05148500  | -2.77719300 | 1.51295200  | C                          | 4.80806000  | 0.32973300  | 0.77274200  |
| O                          | 0.44295900  | -3.76743900 | -0.90159700 | H                          | 4.67961800  | 0.40071400  | 1.85478200  |
| O                          | 1.75049800  | -1.39391200 | -0.66313100 | H                          | 5.84593700  | 0.03781600  | 0.57651900  |
| H                          | 1.10466800  | -4.45091500 | -0.77774000 | H                          | 4.66695000  | 1.33191000  | 0.35964500  |
| H                          | 1.51553200  | -2.06280600 | 1.96943000  |                            |             |             |             |
| H                          | -0.00330300 | 3.89308800  | -1.65690600 | <b>CA[3-4]<sup>≠</sup></b> |             |             |             |
| H                          | 0.66950200  | 3.41284900  | 2.00351100  | Si                         | 1.79937200  | -1.83070000 | -0.06590900 |
| Si                         | 2.40821600  | 0.02694500  | -0.18614000 | O                          | 0.17741600  | -2.11046600 | -0.00613000 |
| O                          | 2.38398800  | -0.05146500 | 1.47276700  | Nb                         | -1.35259600 | -0.93736800 | 0.17212100  |
| O                          | 3.89147300  | 0.21642900  | -0.84138200 | O                          | -1.72882100 | 0.99067700  | 0.43653300  |
| H                          | 2.27858000  | 0.79134500  | 1.93247200  | Si                         | -0.76813200 | 2.28982600  | 0.17399700  |

|            |             |             |             |                 |             |             |             |
|------------|-------------|-------------|-------------|-----------------|-------------|-------------|-------------|
| O          | -1.61566700 | 3.53979000  | -0.45908900 | H               | -0.42354500 | 3.34926300  | 2.04302200  |
| O          | -0.04181500 | 2.83665500  | 1.56191500  | Si              | 2.29274100  | 0.73520100  | -0.16868500 |
| O          | 0.49895100  | 1.83460800  | -0.77186400 | O               | 2.27714800  | 0.64383500  | 1.48877800  |
| O          | 2.43589700  | -1.62253700 | 1.43897100  | O               | 3.64627800  | 1.38027500  | -0.80999900 |
| O          | 2.47929600  | -3.11300300 | -0.81399600 | H               | 1.88877400  | 1.39906700  | 1.94979800  |
| O          | 2.06252200  | -0.42626500 | -0.91553300 | H               | 4.42102900  | 0.82031200  | -0.89164000 |
| C          | -1.53254900 | -1.24710900 | 2.68398300  | H               | -3.31780300 | -1.23339500 | -0.69056900 |
| H          | 3.41667400  | -3.26042100 | -0.67370400 | C               | -2.16590500 | -0.57682900 | -2.52576700 |
| H          | 2.59780000  | -0.69518900 | 1.66902800  | H               | -3.04490900 | 0.00870100  | -2.80663800 |
| H          | -2.33495500 | 3.33698300  | -1.06126900 | H               | -1.27074300 | -0.13700300 | -2.99317100 |
| H          | -0.53124300 | 3.45116100  | 2.11359700  | H               | -2.30345300 | -1.59001200 | -2.91237200 |
| Si         | 1.98604700  | 1.17626200  | -0.57604300 | H               | -3.76296200 | -0.39935700 | 1.53761100  |
| O          | 2.37979100  | 1.26771300  | 1.03793500  | H               | -3.13592100 | -2.03532100 | 1.53201300  |
| O          | 2.99116100  | 1.99600900  | -1.56870800 | C               | -1.90248800 | -0.63791100 | 2.67233400  |
| H          | 1.93049800  | 1.96714600  | 1.53331100  | H               | -0.98253700 | -1.23137900 | 2.65075700  |
| H          | 3.79704800  | 1.55653400  | -1.84756800 | H               | -1.61780500 | 0.41919700  | 2.67842500  |
| H          | -2.17617300 | -1.68034500 | 1.81364200  | H               | -2.38487900 | -0.84279100 | 3.63610600  |
| C          | -2.55583100 | -1.32176200 | -1.56570600 |                 |             |             |             |
| H          | -1.97255500 | -0.74140400 | -2.31732000 |                 |             |             |             |
| C          | -4.04491300 | -0.99004600 | -1.67889600 | <b>CA[4-0]≠</b> |             |             |             |
| H          | -2.36379000 | -2.37929400 | -1.79246000 | Si              | -0.30763300 | 2.48140600  | 0.00088800  |
| H          | -1.67731900 | -0.17994300 | 2.84895600  | O               | 1.05861200  | 1.68521500  | -0.46179700 |
| H          | -2.00330700 | -1.80233900 | 3.49763800  | Nb              | 1.50734100  | -0.18930300 | -0.62396600 |
| H          | -0.47333500 | -1.51478000 | 2.66336600  | O               | 0.76462500  | -1.96548200 | -0.18116700 |
| H          | -4.42590800 | -1.13568900 | -2.69794200 | Si              | -0.79805600 | -2.35731700 | 0.11686900  |
| H          | -4.63218100 | -1.62589800 | -1.01166800 | O               | -1.16902800 | -3.82619800 | -0.50285800 |
| H          | -4.24693100 | 0.04818000  | -1.39975300 | O               | -1.15723800 | -2.39882400 | 1.73594100  |
|            |             |             |             | O               | -1.75321200 | -1.15186200 | -0.46503300 |
|            |             |             |             | O               | -0.40592100 | 2.63908300  | 1.63651100  |
| <b>CA4</b> |             |             |             | O               | -0.27404900 | 3.94591500  | -0.72046600 |
| Si         | 1.29110100  | -2.12644100 | -0.05111300 | O               | -1.62613300 | 1.59599300  | -0.49445700 |
| O          | -0.31739600 | -1.81820500 | -0.23719000 | C               | 2.99825600  | -0.22056600 | 1.41487900  |
| Nb         | -1.75660700 | -0.57070000 | -0.37289200 | H               | -0.83457100 | 4.63171700  | -0.35223900 |
| O          | -1.53388400 | 1.34363800  | -0.14355400 | H               | -0.98730300 | 1.98784900  | 2.05669800  |
| Si         | -0.28948800 | 2.41296100  | -0.02560900 | H               | -0.75389300 | -4.08337700 | -1.32928800 |
| O          | -0.66693900 | 3.82140800  | -0.76093600 | H               | -0.98226000 | -3.21212100 | 2.21506300  |
| O          | 0.12082800  | 2.73784800  | 1.54132400  | Si              | -2.39877400 | 0.26053400  | 0.06164000  |
| O          | 1.04354000  | 1.68393700  | -0.64146200 | O               | -2.20816600 | 0.32987400  | 1.71166000  |
| O          | 1.71151300  | -2.31048900 | 1.52562700  | O               | -3.95204900 | 0.27638700  | -0.44306200 |
| O          | 1.62257700  | -3.48610300 | -0.88611000 | H               | -2.10516500 | -0.52633000 | 2.15094100  |
| O          | 2.10592700  | -0.81662600 | -0.65759900 | H               | -4.38075400 | 1.12951100  | -0.53662200 |
| C          | -2.83740700 | -0.98314300 | 1.49987300  | H               | 3.23139500  | -0.24129900 | 0.26230300  |
| H          | 2.40126200  | -3.98518300 | -0.63114200 | C               | 1.78029800  | -0.43939800 | -2.76185700 |
| H          | 1.96988000  | -1.48886300 | 1.96522400  | H               | 2.29245800  | -1.35827900 | -3.05655300 |
| H          | -1.17838500 | 3.79249400  | -1.57283200 | H               | 0.76255200  | -0.45112700 | -3.19470300 |

|                 |             |             |             |                 |             |             |             |
|-----------------|-------------|-------------|-------------|-----------------|-------------|-------------|-------------|
| H               | 2.31872700  | 0.41331900  | -3.18488000 | O               | -0.58689800 | -1.42830600 | 0.11064200  |
| H               | 2.37704700  | 0.62261800  | 1.73410500  | Nb              | -1.90571500 | -0.01287400 | -0.02243100 |
| H               | 2.54503200  | -1.15726500 | 1.74714100  | O               | -0.96794800 | 1.67027800  | 0.01077700  |
| C               | 4.42384500  | -0.06439800 | 1.96594300  | Si              | 0.51996800  | 2.37818600  | 0.02539900  |
| H               | 4.40770200  | -0.04759800 | 3.05782600  | O               | 0.45140000  | 3.85342400  | -0.67260000 |
| H               | 5.06078200  | -0.89255100 | 1.64682300  | O               | 1.10305800  | 2.56696100  | 1.55881200  |
| H               | 4.87582200  | 0.86701100  | 1.61846100  | O               | 1.57276700  | 1.35680800  | -0.69311200 |
|                 |             |             |             | O               | 1.36950500  | -2.66589000 | 1.55409000  |
| <b>CA[2-5]≠</b> |             |             |             | O               | 0.51096300  | -3.67056000 | -0.78222100 |
| Si              | 0.66271000  | -2.27284800 | 0.15868300  | O               | 1.92600600  | -1.35054600 | -0.70776400 |
| O               | -0.63148900 | -1.30103800 | 0.25333900  | H               | 1.16929500  | -4.36685500 | -0.73331800 |
| Nb              | -1.98449300 | 0.11954200  | 0.01378900  | H               | 1.89493000  | -1.95786600 | 1.94982500  |
| O               | -0.91063100 | 1.73056100  | -0.00857700 | H               | -0.03171800 | 3.95954000  | -1.49499000 |
| Si              | 0.61840500  | 2.33687800  | -0.01220200 | H               | 0.77528200  | 3.29543800  | 2.09133300  |
| O               | 0.63120300  | 3.82211000  | -0.69891400 | Si              | 2.55883800  | 0.10314400  | -0.30372600 |
| O               | 1.23352400  | 2.48742400  | 1.51440600  | O               | 2.69951200  | 0.05041700  | 1.34911000  |
| O               | 1.60751100  | 1.27097600  | -0.75393100 | O               | 3.96014100  | 0.35610200  | -1.10212300 |
| O               | 1.30495500  | -2.66498800 | 1.62262300  | H               | 2.54130900  | 0.88223300  | 1.81414400  |
| O               | 0.24251900  | -3.65312700 | -0.61968400 | H               | 4.54417700  | -0.39456100 | -1.22837900 |
| O               | 1.83160100  | -1.44820500 | -0.70023500 | C               | -4.03410600 | 0.57621200  | -0.24506900 |
| H               | 0.83672500  | -4.40060600 | -0.52406500 | H               | -4.13774900 | 1.18563600  | -1.15141300 |
| H               | 1.88463800  | -1.97997000 | 1.98022200  | H               | -4.73649300 | -0.25760300 | -0.31900800 |
| H               | 0.15514500  | 3.95551400  | -1.52132300 | C               | -2.34269400 | -0.83059800 | -2.00730500 |
| H               | 0.93405800  | 3.21527300  | 2.06391400  | H               | -2.92348300 | -0.15256900 | -2.63482900 |
| Si              | 2.55143500  | -0.01855900 | -0.37046600 | H               | -1.39285600 | -1.06999800 | -2.49524500 |
| O               | 2.78408700  | -0.01957400 | 1.27191800  | H               | -2.90612700 | -1.76161000 | -1.88032400 |
| O               | 3.92024300  | 0.14153100  | -1.24881600 | C               | -2.69487100 | -0.72547100 | 1.88907900  |
| H               | 2.62318900  | 0.82220600  | 1.71855300  | H               | -4.32531500 | 1.19121300  | 0.61525900  |
| H               | 4.45875900  | -0.64285100 | -1.37249300 | H               | -3.30650400 | 0.02613600  | 2.39238300  |
| C               | -3.81404600 | 0.66683800  | -0.58405300 | H               | -3.30586100 | -1.61847700 | 1.71966900  |
| H               | -3.04511500 | -0.14757400 | -1.50131900 | H               | -1.84580800 | -1.00049600 | 2.52247500  |
| H               | -4.79809900 | 0.43535500  | -0.97802000 |                 |             |             |             |
| C               | -2.34908100 | -1.31303000 | -1.91723500 | <b>CA[5-4]≠</b> |             |             |             |
| H               | -3.10995000 | -1.32765900 | -2.70453500 | C               | -3.96815100 | -0.91584300 | 0.00098900  |
| H               | -1.37004100 | -1.19627100 | -2.38354300 | Nb              | -1.67254300 | -0.30286200 | 0.07618600  |
| H               | -2.38457900 | -2.26024600 | -1.37948200 | O               | -1.30099600 | 1.58615700  | 0.33039000  |
| C               | -2.62721400 | -0.27700000 | 2.05644000  | Si              | 0.00076900  | 2.50413200  | -0.10789800 |
| H               | -3.66613400 | 1.74496400  | -0.40353200 | O               | 1.34147500  | 1.61416300  | 0.20903100  |
| H               | -3.28272400 | 0.48716300  | 2.47514900  | Si              | 2.46838900  | 0.46311800  | 0.03686400  |
| H               | -3.16685000 | -1.23106800 | 2.04611800  | O               | 3.70327000  | 1.10817700  | -0.81990900 |
| H               | -1.72666900 | -0.39827300 | 2.66688000  | O               | -0.50350500 | -1.81598500 | -0.03393100 |
|                 |             |             |             | Si              | 1.07324500  | -2.24797200 | -0.24662700 |
| <b>CA5</b>      |             |             |             | O               | 1.89876700  | -0.88511000 | -0.69672700 |
| Si              | 0.79570900  | -2.30009300 | 0.05882600  | O               | 1.76797300  | -2.83878300 | 1.11703900  |

|                 |             |             |             |                 |             |             |             |
|-----------------|-------------|-------------|-------------|-----------------|-------------|-------------|-------------|
| O               | 1.09270800  | -3.38546800 | -1.41867000 | H               | 2.31688500  | -0.43265400 | 2.75560000  |
| O               | -0.13166500 | 2.91568700  | -1.69353900 | C               | 4.06570600  | -1.22296000 | -0.45556100 |
| O               | 0.13883900  | 3.86604800  | 0.78375700  | H               | 3.42487100  | -0.87668800 | 0.74914200  |
| O               | 2.91627100  | -0.09430000 | 1.53659600  | H               | 3.86554800  | -2.17687300 | -0.95409200 |
| C               | -2.89046900 | -0.38564100 | -1.53221700 | H               | 4.32631100  | -0.46549700 | -1.20122400 |
| H               | 1.84502900  | -3.98072500 | -1.43647400 | H               | 4.94600500  | -1.37094300 | 0.17333900  |
| H               | 2.22753500  | -2.17470000 | 1.64878500  |                 |             |             |             |
| H               | -0.42091900 | 2.20001800  | -2.27068500 | <b>CA6</b>      |             |             |             |
| H               | -0.47753600 | 4.57713700  | 0.59709400  | Si              | -2.30474100 | -0.53458600 | -0.03666200 |
| H               | 3.11203100  | 0.55351600  | 2.21849800  | O               | -1.12479200 | -1.56272800 | -0.53305500 |
| H               | 4.33600200  | 0.49998000  | -1.20840200 | Nb              | 0.72004100  | -2.07168800 | -0.21594200 |
| C               | -1.91894200 | -0.47049400 | 2.29957800  | O               | 1.73069900  | -0.51933900 | -0.81211000 |
| H               | -3.45557900 | 0.45700800  | -1.92127700 | Si              | 2.20392000  | 0.89964400  | -0.10467000 |
| H               | -1.26559200 | 0.11550700  | -1.79970400 | O               | 2.97037500  | 0.57596300  | 1.31127500  |
| H               | -2.93384500 | -1.26258800 | -2.17396200 | O               | 3.21689000  | 1.75315100  | -1.06781200 |
| H               | -4.29889200 | -0.16408200 | 0.71848900  | O               | 0.86525900  | 1.82195100  | 0.07616800  |
| H               | -4.74945800 | -1.04178300 | -0.74991400 | O               | -3.19409900 | 0.04824900  | -1.28946800 |
| H               | -3.80989800 | -1.87950100 | 0.48862400  | O               | -3.28419900 | -1.34549600 | 0.99240900  |
| H               | -2.23240700 | -1.47532300 | 2.60851700  | O               | -1.56739400 | 0.75049200  | 0.70710400  |
| H               | -0.96211300 | -0.25303500 | 2.79142100  | C               | 0.93585700  | -2.10589600 | 1.56350300  |
| H               | -2.65348200 | 0.24322200  | 2.69022700  | H               | -4.15557900 | -0.97402800 | 1.14532200  |
|                 |             |             |             | H               | -2.84123100 | 0.86407100  | -1.67048600 |
| <b>CA[2-6]≠</b> |             |             |             | H               | 2.65428500  | -0.22623000 | 1.74683800  |
| Si              | -1.18672400 | -2.13183700 | -0.03788000 | H               | 4.15414700  | 1.57649300  | -0.96491300 |
| O               | 0.38093300  | -1.85248800 | -0.42430300 | Si              | -0.72882200 | 2.07033800  | 0.22802100  |
| Nb              | 1.82517200  | -0.58567100 | -0.09831200 | O               | -1.39376200 | 2.41307900  | -1.25855600 |
| O               | 1.23753100  | 1.15580900  | -0.74795600 | O               | -0.90651200 | 3.28827800  | 1.30754700  |
| Si              | 0.36325200  | 2.40174800  | -0.10578300 | H               | -0.94393200 | 3.05612600  | -1.81242600 |
| O               | 1.08190500  | 2.92403600  | 1.27639800  | H               | -1.77541000 | 3.39330000  | 1.70106200  |
| O               | 0.23668300  | 3.66684300  | -1.13806400 | H               | 0.88619900  | -1.99949600 | 2.64556000  |
| O               | -1.16021300 | 1.85315300  | 0.13158000  |                 |             |             |             |
| O               | -2.12359200 | -2.44580700 | -1.35162800 | <b>CA[6-7]≠</b> |             |             |             |
| O               | -1.24378400 | -3.40793600 | 0.98442500  | Si              | 0.69193900  | -2.32255500 | -0.17887400 |
| O               | -1.76806200 | -0.75160200 | 0.67973400  | O               | -0.70605400 | -1.54730600 | -0.54670400 |
| C               | 2.13971800  | -0.42140400 | 1.68427200  | Nb              | -1.95588400 | -0.10273300 | -0.23389200 |
| H               | -2.08113300 | -3.87190700 | 1.04879800  | O               | -0.99358500 | 1.57637100  | -0.56776100 |
| H               | -2.53273600 | -1.65829200 | -1.73625100 | Si              | 0.38850200  | 2.36540800  | -0.18818000 |
| H               | 1.52723200  | 2.23118500  | 1.77826300  | O               | 0.43541200  | 3.83339200  | -0.91127300 |
| H               | 0.94635800  | 4.31200900  | -1.11612100 | O               | 0.56941300  | 2.57930900  | 1.44410900  |
| Si              | -2.31149600 | 0.71421000  | 0.20205600  | O               | 1.66974200  | 1.42703800  | -0.59964300 |
| O               | -2.90767000 | 0.41035600  | -1.32206400 | O               | 0.85153800  | -2.69081000 | 1.41574200  |
| O               | -3.44826400 | 1.27505800  | 1.23814200  | O               | 0.73048500  | -3.69964600 | -1.05905700 |
| H               | -3.14278100 | 1.16297100  | -1.87073500 | O               | 1.93387300  | -1.30211200 | -0.59487000 |
| H               | -4.05536000 | 0.62829500  | 1.60418500  | H               | 1.30892600  | -4.39676500 | -0.74311800 |

|            |             |             |             |                 |                 |             |             |
|------------|-------------|-------------|-------------|-----------------|-----------------|-------------|-------------|
| H          | 1.21389300  | -1.96695600 | 1.94453800  |                 |                 |             |             |
| H          | 0.22103100  | 3.88272500  | -1.84541000 |                 | <b>CA[7-3]≠</b> |             |             |
| H          | -0.09648200 | 3.09040300  | 1.90999600  | Si              | -0.16189100     | 2.44701800  | -0.02355600 |
| Si         | 2.45014200  | 0.12636300  | 0.01852700  | O               | 1.09185200      | 1.38050400  | -0.08230700 |
| O          | 2.08312900  | 0.03310700  | 1.63679200  | Nb              | 1.76707000      | -0.40289700 | -0.17439700 |
| O          | 4.03747000  | 0.32981800  | -0.31058900 | O               | 0.63698400      | -1.96740600 | -0.03968200 |
| H          | 1.78656400  | 0.86035100  | 2.04031600  | Si              | -0.97448500     | -2.30424300 | -0.00808500 |
| H          | 4.58592500  | -0.45691400 | -0.33406500 | O               | -1.28335400     | -3.70674700 | -0.78734800 |
| C          | -2.52071300 | -0.14097100 | 1.51206700  | O               | -1.56237000     | -2.42009300 | 1.53000900  |
| H          | -3.50221300 | -0.27233200 | -1.07895600 | O               | -1.77222000     | -1.02076100 | -0.64079900 |
| H          | -2.86000200 | -0.22270200 | 2.54146100  | O               | -0.52749700     | 2.91577900  | 1.50612700  |
| C          | -4.51247900 | -0.24124200 | 0.16753300  | O               | 0.26786600      | 3.74393800  | -0.91448400 |
| H          | -5.03090100 | -0.96828600 | -0.45481000 | O               | -1.48857000     | 1.68183500  | -0.66064000 |
| H          | -4.69803000 | -0.49358300 | 1.20478200  | H               | -0.21815200     | 4.55874700  | -0.77265200 |
| H          | -4.85784900 | 0.76706600  | -0.04735200 | H               | -1.12367300     | 2.31461200  | 1.97162400  |
|            |             |             |             | H               | -0.84082100     | -3.87239000 | -1.62289200 |
| <b>CA7</b> |             |             |             | H               | -1.32385000     | -3.18441900 | 2.05957900  |
| Si         | 0.02479800  | 2.44595900  | -0.04100800 | Si              | -2.40794500     | 0.41656700  | -0.17854200 |
| O          | 1.20601600  | 1.30692600  | -0.20594900 | O               | -2.37303000     | 0.49125000  | 1.47899800  |
| Nb         | 1.72991400  | -0.52250200 | -0.39527800 | O               | -3.89735700     | 0.50951000  | -0.83956300 |
| O          | 0.54843200  | -2.03704000 | -0.07068300 | H               | -2.41868400     | -0.35698000 | 1.93917900  |
| Si         | -1.07944100 | -2.24802100 | 0.02945300  | H               | -4.29189900     | 1.37881600  | -0.93502400 |
| O          | -1.53518500 | -3.63143900 | -0.70956100 | C               | 3.68685200      | -0.70871400 | 0.18155600  |
| O          | -1.61742900 | -2.29198800 | 1.59099200  | H               | 3.85245200      | -1.79101200 | 0.28577400  |
| O          | -1.78805600 | -0.90602300 | -0.59370000 | H               | 3.22483200      | -0.64256800 | -1.26732800 |
| O          | -0.22256200 | 2.87470100  | 1.52347900  | C               | 4.94013600      | 0.11636800  | 0.31037000  |
| O          | 0.48152900  | 3.74235500  | -0.91657300 | H               | 5.72334100      | -0.21271800 | -0.38254000 |
| O          | -1.37741200 | 1.77644400  | -0.62220400 | H               | 4.75323200      | 1.17789900  | 0.13721500  |
| H          | 0.05754500  | 4.58124500  | -0.72478700 | H               | 5.33345100      | 0.00958600  | 1.32583000  |
| H          | -0.85748900 | 2.31533400  | 1.99080700  |                 |                 |             |             |
| H          | -1.10368300 | -3.87703700 | -1.53111600 | <b>CB[0-1]≠</b> |                 |             |             |
| H          | -1.48445100 | -3.09427400 | 2.10125400  | Si              | 2.61947100      | -0.11050300 | 0.17205200  |
| Si         | -2.34164900 | 0.55794200  | -0.10743400 | O               | 1.53281300      | 1.10022300  | 0.01403200  |
| O          | -2.23842500 | 0.62846800  | 1.54797200  | Nb              | -0.31528700     | 1.61595400  | -0.25625800 |
| O          | -3.84838000 | 0.72100400  | -0.71093000 | O               | -2.22169000     | 1.22297300  | 0.16089800  |
| H          | -2.32327500 | -0.21620600 | 2.01002700  | Si              | -2.42504500     | -0.39380000 | 0.21444600  |
| H          | -4.21660200 | 1.60466300  | -0.77476700 | O               | -3.00633000     | -0.96630800 | 1.62374600  |
| C          | 3.47186100  | -0.85568600 | 0.35053900  | O               | -3.33479700     | -1.02934900 | -0.99935900 |
| H          | 3.54236300  | -1.95017000 | 0.46859500  | O               | -0.80612000     | -0.82046600 | 0.03241100  |
| H          | 2.27097200  | -0.72629700 | -2.05883500 | O               | 3.78291500      | -0.12642400 | -0.98663600 |
| C          | 4.67385300  | -0.08039700 | 0.80708900  | O               | 3.37520700      | 0.05096900  | 1.61353000  |
| H          | 5.56241300  | -0.37042300 | 0.23350700  | O               | 1.76692000      | -1.52840200 | 0.09015400  |
| H          | 4.53614100  | 0.99627600  | 0.68528900  | H               | -0.23909100     | 3.51540600  | -0.68461600 |
| H          | 4.89519100  | -0.27360200 | 1.86375700  | H               | 4.24940000      | -0.33617300 | 1.69377400  |



|                 |             |             |             |            |             |             |             |
|-----------------|-------------|-------------|-------------|------------|-------------|-------------|-------------|
| H               | 3.53785400  | -0.43401800 | -1.86242100 | O          | -1.01452900 | 1.37921500  | -0.23344500 |
| H               | -3.75027700 | -1.57108200 | 1.60162100  | Nb         | -2.18253500 | -0.12592600 | 0.19001600  |
| H               | -3.35378700 | -0.54080300 | -1.82673700 | O          | -0.95599900 | -1.60211900 | 0.05390500  |
| Si              | 0.25582900  | -2.08233100 | -0.12540900 | Si         | 0.51912400  | -2.29588700 | -0.10165500 |
| O               | 0.20639600  | -2.70586700 | -1.64524000 | O          | 1.14466100  | -2.85043400 | 1.31118700  |
| O               | -0.19171000 | -3.16855300 | 1.01889600  | O          | 0.35284300  | -3.53661700 | -1.15267900 |
| H               | -0.63748600 | -3.03735500 | -1.96213800 | O          | 1.54026200  | -1.13437900 | -0.69789400 |
| H               | 0.40711900  | -3.89228700 | 1.21598400  | O          | 0.26648200  | 3.58338000  | -1.22072700 |
| H               | -0.40244700 | 1.80618600  | -1.99947300 | O          | 0.11425100  | 3.18499100  | 1.38309300  |
| C               | -0.22592300 | 4.15492900  | 0.28623700  | O          | 1.62001800  | 1.54104800  | -0.15220600 |
| H               | -0.19566800 | 5.12486900  | -0.22055500 | H          | -2.61418900 | 0.79473800  | 1.63019900  |
| H               | -1.12859700 | 4.10729200  | 0.89289800  | H          | -3.14756800 | -1.17898900 | 1.39207400  |
| H               | 0.66285900  | 4.05677200  | 0.90613400  | C          | -3.87843600 | -0.30484000 | -0.82833400 |
|                 |             |             |             | H          | 0.38809400  | 4.10431200  | 1.40634500  |
| <b>CB1</b>      |             |             |             | H          | 0.62579900  | 3.35014300  | -2.07933400 |
| Si              | 2.45520100  | -0.10878800 | -0.05421700 | H          | 1.71006000  | -2.21425900 | 1.77061200  |
| O               | 1.38152500  | -1.35467700 | -0.22290200 | H          | 0.98239300  | -4.25627700 | -1.07436900 |
| Nb              | -0.40916800 | -1.97928200 | -0.36122200 | Si         | 2.39931000  | 0.11959000  | -0.09970700 |
| O               | -1.94361900 | -0.82419300 | -0.19720400 | O          | 3.77992400  | 0.33906800  | -0.95331400 |
| Si              | -2.29222400 | 0.78350500  | -0.06286600 | O          | 2.66732500  | -0.33668700 | 1.47841100  |
| O               | -3.67665400 | 1.13853500  | -0.84948200 | H          | 4.25403000  | -0.45040700 | -1.22352100 |
| O               | -2.44052000 | 1.25340500  | 1.51074200  | H          | 3.00832700  | 0.31961700  | 2.09113700  |
| O               | -0.99297800 | 1.61440800  | -0.61381000 | H          | -3.81329600 | -0.96293800 | 0.60117900  |
| O               | 2.87424400  | 0.14074100  | 1.51149300  | H          | -4.48258200 | 0.60650200  | -0.73422400 |
| O               | 3.76841600  | -0.48614400 | -0.93918700 | H          | -4.33649600 | -1.06613100 | -1.45471300 |
| O               | 1.69976400  | 1.25283800  | -0.61956500 |            |             |             |             |
| H               | -0.55176700 | -2.36823400 | -2.05974400 | <b>CB2</b> |             |             |             |
| H               | -0.62264900 | -3.64184600 | -0.77773600 | Si         | -2.45659700 | 0.08792000  | 0.00543000  |
| C               | -0.64143900 | -3.18504600 | 1.44957400  | O          | -1.39261600 | 1.34820000  | 0.07760500  |
| H               | 4.60112200  | -0.06996900 | -0.70765700 | Nb         | 0.39452500  | 2.01098800  | 0.15755300  |
| H               | 2.28513100  | 0.73606600  | 1.99360400  | O          | 1.95662900  | 0.87391200  | 0.06643400  |
| H               | -3.84805300 | 0.72211200  | -1.69732200 | Si         | 2.31064200  | -0.73482400 | -0.01423500 |
| H               | -3.24984600 | 1.04006600  | 1.98127200  | O          | 3.72405900  | -0.97544900 | -0.79400200 |
| Si              | 0.45507500  | 2.17979100  | -0.09859700 | O          | 2.40672200  | -1.43139500 | 1.47813600  |
| O               | 0.51359500  | 2.03525300  | 1.55424600  | O          | 1.03448600  | -1.47827300 | -0.72343100 |
| O               | 0.59552300  | 3.70296700  | -0.66297500 | O          | -2.94064300 | -0.41395000 | 1.48958300  |
| H               | -0.32747200 | 2.11662300  | 2.02108800  | O          | -3.74032200 | 0.58990100  | -0.86300300 |
| H               | 1.47484600  | 4.07923700  | -0.73861700 | O          | -1.66415200 | -1.16245300 | -0.74170300 |
| H               | -1.59963900 | -3.70741300 | 1.50295600  | H          | -4.57074900 | 0.12508900  | -0.74217200 |
| H               | 0.15152100  | -3.92831900 | 1.56225200  | H          | -2.34335900 | -1.04563900 | 1.91125700  |
| H               | -0.57576300 | -2.46565200 | 2.28122600  | H          | 3.92452200  | -0.43936700 | -1.56453900 |
|                 |             |             |             | H          | 3.19410700  | -1.28610500 | 2.00799200  |
| <b>CB[1-2]≠</b> |             |             |             | Si         | -0.41354300 | -2.13168600 | -0.32214300 |
| Si              | 0.22857100  | 2.41957800  | -0.06125800 | O          | -0.50683000 | -2.21198800 | 1.33325600  |

|   |             |             |             |
|---|-------------|-------------|-------------|
| O | -0.51149100 | -3.56699200 | -1.09048900 |
| H | 0.32982100  | -2.32718700 | 1.80193900  |
| H | -1.37982200 | -3.95615600 | -1.21339000 |
| C | 0.61440400  | 3.62779300  | -0.86787800 |
| H | 1.59630600  | 3.99142800  | -1.17877200 |
| H | -0.22208100 | 4.23568700  | -1.21652000 |
| H | 0.51552800  | 2.81315400  | 1.71596800  |

**CB[2-3]#**

|    |             |             |             |
|----|-------------|-------------|-------------|
| Si | 2.29440100  | -0.84980600 | -0.03806200 |
| O  | 0.94328400  | -1.78677700 | 0.06214500  |
| Nb | -0.96204900 | -1.80125100 | -0.06820400 |
| O  | -2.03203500 | -0.20711700 | -0.06700300 |
| Si | -2.03366300 | 1.44374900  | -0.01107400 |
| O  | -3.10780200 | 2.03092300  | -1.09755500 |
| O  | -2.42690200 | 2.01642000  | 1.47140900  |
| O  | -0.50974500 | 1.95585100  | -0.30099000 |
| O  | 3.00079500  | -0.56956000 | 1.41474500  |
| O  | 3.34062800  | -1.61587500 | -1.02782000 |
| O  | 1.81044600  | 0.60563100  | -0.66965700 |
| H  | 4.27393900  | -1.42623000 | -0.91281200 |
| H  | 2.68972300  | 0.22842900  | 1.86337300  |
| H  | -3.12620400 | 1.64113100  | -1.97446900 |
| H  | -3.33665300 | 1.92039800  | 1.76175900  |
| Si | 1.10530100  | 1.98066500  | -0.13710500 |
| O  | 1.52009500  | 2.01316200  | 1.47177700  |
| O  | 1.62879400  | 3.27752700  | -0.98222600 |
| H  | 1.05734700  | 2.62627000  | 2.04935300  |
| H  | 2.55844600  | 3.30593200  | -1.21847400 |
| C  | -1.87249500 | -3.50674900 | 0.33100500  |
| H  | -2.95462500 | -3.63916100 | 0.36558700  |
| H  | -1.61658400 | -3.12326700 | -1.16002000 |
| H  | -1.33139600 | -4.44773600 | 0.44478500  |

**CB[4-5]#**

|    |             |             |             |
|----|-------------|-------------|-------------|
| C  | -3.19784300 | -1.46950000 | 1.38391900  |
| Nb | -1.53788000 | -0.74547000 | -0.13071200 |
| O  | -1.60947800 | 1.16751100  | -0.43672800 |
| Si | -0.65358400 | 2.47328200  | -0.10834900 |
| O  | 0.90207200  | 1.97508500  | -0.08467300 |
| Si | 2.16259500  | 0.96740200  | 0.06996800  |
| O  | 3.41791100  | 1.71581200  | -0.66905500 |
| O  | -0.18814300 | -2.09309100 | -0.31769300 |
| Si | 1.45736400  | -2.03085900 | -0.16344400 |

|   |             |             |             |
|---|-------------|-------------|-------------|
| O | 1.89897100  | -0.49872900 | -0.61324400 |
| O | 2.00960100  | -2.31624700 | 1.35319300  |
| O | 2.05700700  | -3.16010900 | -1.18087100 |
| O | -0.91922000 | 3.62714400  | -1.24679300 |
| O | -0.96666500 | 3.16177100  | 1.34566100  |
| O | 2.46340100  | 0.61745700  | 1.66412800  |
| C | -3.33718000 | -1.52607000 | -0.56592100 |
| H | 2.91501700  | -3.52885900 | -0.96155700 |
| H | 2.13057400  | -1.51599800 | 1.88370700  |
| H | -1.00695200 | 3.34243100  | -2.15914300 |
| H | -1.63169500 | 3.85348600  | 1.35545000  |
| H | 2.26550400  | 1.29831000  | 2.31240600  |
| H | 4.20567200  | 1.19217300  | -0.83038300 |
| H | -0.65427600 | -0.25728200 | 1.39600400  |
| H | -4.22720200 | -0.93065200 | -0.75156100 |
| H | -2.29893900 | -1.04549800 | -1.87244000 |
| H | -3.47846900 | -2.58533700 | -0.76773400 |
| H | -3.27830900 | -0.51938300 | 1.91441300  |
| H | -4.19088900 | -1.91883700 | 1.32792500  |
| H | -2.53975400 | -2.15723400 | 1.91826600  |

**CB5**

|    |             |             |             |
|----|-------------|-------------|-------------|
| C  | -3.86095600 | -1.66848900 | 1.27261600  |
| Nb | -1.44310700 | -0.61820400 | -0.34036800 |
| O  | -1.70450700 | 1.31155700  | -0.28775200 |
| Si | -0.59676900 | 2.51902900  | -0.05463500 |
| O  | 0.89630700  | 1.86187500  | -0.17993500 |
| Si | 2.16353200  | 0.87815100  | 0.07746400  |
| O  | 3.44536300  | 1.61521500  | -0.62506900 |
| O  | -0.22551200 | -2.11970300 | -0.31307600 |
| Si | 1.41264300  | -2.12457000 | -0.09702500 |
| O  | 1.96143600  | -0.62258900 | -0.54072600 |
| O  | 1.87706500  | -2.39048800 | 1.45560200  |
| O  | 2.01324300  | -3.29735200 | -1.06226100 |
| O  | -0.84518800 | 3.71806500  | -1.14513500 |
| O  | -0.68348200 | 3.18223700  | 1.44256600  |
| O  | 2.37155400  | 0.59609100  | 1.70075000  |
| C  | -3.40945700 | -1.46772400 | -0.18164100 |
| H  | 2.86572800  | -3.66635900 | -0.82285400 |
| H  | 2.04407000  | -1.58482900 | 1.96310200  |
| H  | -0.99724600 | 3.47001400  | -2.05978100 |
| H  | -1.39068700 | 3.81058000  | 1.60416400  |
| H  | 2.25943600  | 1.33626600  | 2.30319500  |
| H  | 4.22377500  | 1.07722400  | -0.78516900 |

|                 |             |             |             |                 |             |             |             |
|-----------------|-------------|-------------|-------------|-----------------|-------------|-------------|-------------|
| H               | -0.56031400 | -0.24407300 | 1.11251100  | Si              | 0.45148600  | 2.34365800  | -0.01761000 |
| H               | -4.08482900 | -0.79138500 | -0.72375500 | O               | 0.36189300  | 3.79422600  | -0.76806400 |
| H               | -0.79303600 | -0.30844200 | -1.92839600 | O               | 1.16381300  | 2.58080700  | 1.45224500  |
| H               | -3.38222400 | -2.41916100 | -0.72980700 | O               | 1.41584300  | 1.27511600  | -0.78536900 |
| H               | -3.89050500 | -0.72408500 | 1.82425100  | O               | 1.33510700  | -2.63528700 | 1.65466800  |
| H               | -4.86791200 | -2.09744700 | 1.31740400  | O               | 0.23993100  | -3.68215400 | -0.54355500 |
| H               | -3.19831700 | -2.35045100 | 1.81341700  | O               | 1.75694600  | -1.43092700 | -0.69607500 |
| <b>CB[5-0]≠</b> |             |             |             | H               | 0.85144600  | -4.41495100 | -0.44402100 |
| Si              | 0.74471300  | -2.39944500 | -0.09621900 | H               | 1.89469700  | -1.92626800 | 1.99618600  |
| O               | -0.77150700 | -1.76268600 | -0.13548300 | H               | -0.13951800 | 3.86923100  | -1.58260700 |
| Nb              | -1.71072100 | -0.09997500 | -0.32797300 | H               | 0.86052800  | 3.30431300  | 2.00532300  |
| O               | -0.91686500 | 1.65205000  | -0.24803300 | Si              | 2.42900600  | 0.03179800  | -0.42029200 |
| Si              | 0.46574300  | 2.53019400  | -0.04661200 | O               | 2.72796100  | 0.06913900  | 1.21009900  |
| O               | 0.56955000  | 3.67364300  | -1.21482200 | O               | 3.75091700  | 0.23578800  | -1.35952400 |
| O               | 0.52947600  | 3.27523700  | 1.40969700  | H               | 2.58686500  | 0.92023100  | 1.64500600  |
| O               | 1.72154900  | 1.48554000  | -0.07356800 | H               | 4.32337800  | -0.52384700 | -1.48558200 |
| O               | 1.20861100  | -2.90771300 | 1.39330800  | C               | -3.99931800 | 0.52124100  | 0.05577400  |
| O               | 0.78087600  | -3.65061900 | -1.14299100 | H               | -3.40136900 | -0.28015700 | -1.02261900 |
| O               | 1.76582100  | -1.17807000 | -0.56825200 | H               | -5.04241800 | 0.25043800  | -0.06635000 |
| C               | -4.13202600 | -0.23654700 | -0.08055600 | C               | -2.71177400 | -1.39551900 | -1.57946500 |
| H               | 1.42457700  | -4.34213700 | -0.97648000 | H               | -3.57738500 | -1.42626900 | -2.24908100 |
| H               | 1.68884500  | -2.24756900 | 1.91151200  | H               | -1.81517800 | -1.25636400 | -2.18593000 |
| H               | 0.28599000  | 3.44010600  | -2.10165100 | H               | -2.64402300 | -2.34327700 | -1.04463200 |
| H               | 0.01205500  | 4.07609600  | 1.51897800  | H               | -2.38668100 | -0.30657500 | 1.91331200  |
| Si              | 2.54131500  | 0.09717900  | 0.09729200  | H               | -3.84468500 | 1.60913500  | 0.15503600  |
| O               | 2.63375700  | -0.32211600 | 1.70340600  | <b>CB[2-5]≠</b> |             |             |             |
| O               | 3.99884500  | 0.33619800  | -0.60305600 | Si              | 1.34659000  | -2.09277300 | -0.06224800 |
| H               | 2.91627400  | 0.34597800  | 2.33355100  | O               | -0.21260000 | -1.67415300 | -0.35282000 |
| H               | 4.51114200  | -0.44188500 | -0.83354100 | Nb              | -1.86537000 | -0.69159400 | -0.38883100 |
| H               | -3.06543400 | -0.12208200 | 0.79331800  | O               | -1.45569000 | 1.22441500  | -0.26525300 |
| H               | -2.41361900 | -0.14365500 | -1.92785900 | Si              | -0.24553200 | 2.30767600  | -0.07482500 |
| H               | -4.37064800 | 0.60996100  | -0.72735100 | O               | -0.62077300 | 3.73266000  | -0.78707600 |
| H               | -4.23828600 | -1.14568100 | -0.67652700 | O               | 0.07420100  | 2.61410800  | 1.52143200  |
| C               | -5.08485600 | -0.27579900 | 1.12991000  | O               | 1.15064600  | 1.66038700  | -0.63868700 |
| H               | -6.12292900 | -0.36490800 | 0.79637400  | O               | 1.65983300  | -2.31040800 | 1.53670600  |
| H               | -4.86858900 | -1.12690300 | 1.78228400  | O               | 1.66296200  | -3.46488300 | -0.88690300 |
| H               | -5.00425300 | 0.63301100  | 1.73401500  | O               | 2.27690700  | -0.82783300 | -0.59878400 |
| <b>CB[2-4]≠</b> |             |             |             | H               | 2.42625300  | -3.97638000 | -0.61088900 |
| Si              | 0.64051900  | -2.28110900 | 0.20608400  | H               | 1.91481400  | -1.49614300 | 1.99215800  |
| O               | -0.68007100 | -1.34596800 | 0.31415500  | H               | -0.96866800 | 3.72289400  | -1.68134400 |
| Nb              | -2.06913900 | 0.05012000  | 0.24147800  | H               | -0.51786300 | 3.19712200  | 2.00190200  |
| O               | -1.05465700 | 1.68854300  | 0.12804200  | Si              | 2.38146500  | 0.72651200  | -0.09346000 |
|                 |             |             |             | O               | 2.25671400  | 0.62900600  | 1.56040700  |

|   |             |             |             |
|---|-------------|-------------|-------------|
| O | 3.76522800  | 1.40213400  | -0.63628600 |
| H | 1.79783800  | 1.36645500  | 1.98553000  |
| H | 4.54304400  | 0.84275300  | -0.68708300 |
| C | -2.66346200 | -1.41169000 | 1.34287800  |
| H | -3.58792800 | -1.12337700 | -0.61742800 |
| H | -3.62325200 | -1.84061500 | 1.60315000  |
| C | -4.16145100 | 0.08231900  | 0.35418300  |
| H | -5.07878200 | -0.49934300 | 0.35200200  |
| H | -4.05123700 | 0.62913000  | 1.28590300  |
| H | -4.14449000 | 0.78344700  | -0.48266000 |
| H | -2.48257100 | -1.03616300 | -1.99966000 |
| H | -2.01224600 | -1.30151100 | 2.22368200  |

## 7. Cartesian coordinates of the optimized structures by using the larger Si<sub>9</sub>O<sub>24</sub>H<sub>10</sub> cluster

obtained at the B3LYP/BS-3 level of theory.

|                 |             |             |             |                 |             |             |             |
|-----------------|-------------|-------------|-------------|-----------------|-------------|-------------|-------------|
| <b>CA0 (Nb)</b> |             |             |             | H               | -4.56845300 | 0.04527400  | -2.73208900 |
| Si              | -1.92950700 | 1.73910200  | -0.08251500 | Si              | 3.50140400  | -1.10634600 | 1.67557800  |
| O               | -1.06863600 | 3.12158300  | -0.06377400 | Si              | 5.18345700  | -0.74553600 | -0.83128400 |
| Nb              | 0.79940600  | 3.55775100  | -0.31813400 | O               | 4.76578900  | -1.36640800 | 0.64191800  |
| O               | 2.13975600  | 2.22584300  | -0.58451300 | O               | 4.04391000  | -0.56975300 | 3.13248000  |
| Si              | 2.55796600  | 0.63701600  | -0.54624300 | H               | 4.13842000  | -1.25309500 | 3.81009300  |
| O               | 4.00237300  | 0.34595100  | -1.23836500 | O               | 2.66073800  | -2.50708200 | 1.80051800  |
| O               | 2.63483800  | 0.13681500  | 1.01291800  | H               | 1.71407600  | -2.47770800 | 2.02502900  |
| O               | 1.38005400  | -0.22126000 | -1.31521500 | O               | 5.22346400  | -1.85746600 | -2.03031700 |
| O               | -2.16312700 | 1.14308100  | 1.43783100  | H               | 6.04099500  | -2.37046100 | -2.09270000 |
| O               | -3.42936700 | 1.88793600  | -0.74410300 | O               | 6.67274500  | -0.05603700 | -0.72152200 |
| O               | -1.10855500 | 0.63556800  | -0.97082200 | H               | 6.89329600  | 0.31976300  | 0.14261200  |
| Si              | -0.12943500 | -0.68044200 | -0.93172800 | Si              | -1.75484600 | -3.11437300 | -1.59417800 |
| O               | -0.14487400 | -1.25410500 | 0.61196200  | Si              | -1.19664000 | -2.33522000 | 1.26401800  |
| O               | -0.73408500 | -1.83204200 | -1.91076300 | O               | -1.77416200 | -3.28382400 | 0.05810400  |
| C               | 1.45339500  | 5.53644300  | 0.13590000  | O               | -3.23122200 | -2.84135400 | -2.22864800 |
| H               | 2.45988500  | 5.56898800  | 0.56225900  | H               | -3.69024600 | -2.00162900 | -2.02278900 |
| H               | 1.46926100  | 6.02202600  | -0.85653100 | O               | -1.16383500 | -4.51252400 | -2.20258400 |
| H               | 0.75781800  | 6.07815800  | 0.78366400  | H               | -1.41338700 | -4.70638200 | -3.11661500 |
| Si              | -3.17842200 | -0.07172300 | 1.92345700  | O               | -2.41960900 | -1.51661800 | 1.98554400  |
| Si              | -4.62437600 | 0.76077400  | -0.59805200 | O               | -0.33926000 | -3.19942100 | 2.37099100  |
| O               | -3.77193300 | 0.21832800  | 3.41622300  | H               | -0.41129500 | -4.16292100 | 2.31193800  |
| H               | -3.88733700 | 1.14888500  | 3.65434200  |                 |             |             |             |
| O               | -4.35987600 | -0.12925000 | 0.75836000  | <b>CA3 (Nb)</b> |             |             |             |
| O               | -6.03824800 | 1.58544300  | -0.58279700 | Si              | -1.82388600 | 1.64381400  | 0.03774800  |
| H               | -6.84340400 | 1.06118500  | -0.46585500 | O               | -0.88775100 | 2.97373500  | 0.05962600  |
| O               | -4.54813200 | -0.34391300 | -1.84367600 | Nb              | 0.94191900  | 3.37171700  | -0.42760200 |

|    |             |             |             |                      |             |             |             |
|----|-------------|-------------|-------------|----------------------|-------------|-------------|-------------|
| O  | 2.24972800  | 1.99761700  | -0.68153300 | C                    | 1.04662700  | 6.49433800  | 0.50124600  |
| Si | 2.64792700  | 0.41974000  | -0.51367700 | H                    | 1.23223200  | 6.46410500  | 1.57675500  |
| O  | 4.04141800  | 0.02620700  | -1.26033800 | H                    | 1.44157700  | 7.44231000  | 0.11944600  |
| O  | 2.80785900  | 0.06280100  | 1.08118500  | H                    | -0.03655300 | 6.50822600  | 0.35436000  |
| O  | 1.43240900  | -0.52211600 | -1.10958400 |                      |             |             |             |
| O  | -2.22609000 | 1.10664300  | 1.54127700  | <b>CA[3-4]# (Nb)</b> |             |             |             |
| O  | -3.23878300 | 1.86651000  | -0.77134800 | Si                   | -2.02591600 | 1.65709900  | 0.08963600  |
| O  | -0.99841200 | 0.44603200  | -0.71332000 | O                    | -1.16250400 | 3.01536100  | 0.28719000  |
| Si | -0.10308300 | -0.91900000 | -0.77744700 | Nb                   | 0.79876100  | 3.20560300  | 0.05743200  |
| O  | -0.17351200 | -1.66221000 | 0.71156900  | O                    | 2.39097800  | 2.11426200  | -0.23428000 |
| O  | -0.75267000 | -1.93363900 | -1.87004200 | Si                   | 2.58165000  | 0.49776800  | -0.40357400 |
| Si | -3.32331200 | -0.08037800 | 1.90103600  | O                    | 3.98586500  | 0.09155400  | -1.12640500 |
| Si | -4.55708500 | 0.88331900  | -0.67302000 | O                    | 2.57792200  | -0.18905600 | 1.09268700  |
| O  | -4.11890700 | 0.20731600  | 3.29578500  | O                    | 1.31180900  | -0.11562600 | -1.26339100 |
| H  | -3.72754900 | -0.16480800 | 4.09837100  | O                    | -2.25673400 | 0.88919400  | 1.53933500  |
| O  | -4.41200500 | -0.07177400 | 0.65774700  | O                    | -3.53640100 | 1.88014500  | -0.53679000 |
| O  | -5.87302600 | 1.85603800  | -0.65502000 | O                    | -1.25808100 | 0.62476900  | -0.93595200 |
| H  | -6.71600000 | 1.43777700  | -0.42823300 | Si                   | -0.20011800 | -0.63072700 | -0.97241700 |
| O  | -4.58507100 | -0.18645900 | -1.95003200 | O                    | -0.24432400 | -1.34435500 | 0.51393200  |
| H  | -4.64486600 | 0.22924500  | -2.82438800 | O                    | -0.72972400 | -1.71512600 | -2.06923900 |
| Si | 3.53459200  | -1.28691200 | 1.72947400  | Si                   | -3.28425300 | -0.35626900 | 1.90147900  |
| Si | 5.13029300  | -1.15814500 | -0.85509800 | Si                   | -4.72067200 | 0.73628800  | -0.52346800 |
| O  | 4.62901600  | -1.77458100 | 0.59602600  | O                    | -3.87040100 | -0.23915500 | 3.42152900  |
| O  | 4.39967100  | -0.93988400 | 3.07883200  | H                    | -4.23944300 | 0.61745700  | 3.67753400  |
| H  | 3.89144300  | -0.94509000 | 3.90196000  | O                    | -4.47747300 | -0.27686500 | 0.75004800  |
| O  | 2.36540800  | -2.38693000 | 2.06206100  | O                    | -6.14470400 | 1.54208000  | -0.45112200 |
| H  | 1.49357400  | -2.16826200 | 1.68062400  | H                    | -6.94682400 | 1.00055900  | -0.44749700 |
| O  | 5.10780100  | -2.25637200 | -2.06636700 | O                    | -4.62004600 | -0.24340700 | -1.86925800 |
| H  | 5.90766100  | -2.79363200 | -2.15046800 | H                    | -4.60251100 | 0.23663300  | -2.71225700 |
| O  | 6.66441100  | -0.58565700 | -0.70060200 | Si                   | 3.36241800  | -1.53190100 | 1.65494600  |
| H  | 6.91529200  | -0.30986900 | 0.19271000  | Si                   | 5.08266900  | -1.10577200 | -0.80578300 |
| Si | -1.94128400 | -3.09054200 | -1.68642900 | O                    | 4.66230300  | -1.75201400 | 0.65694800  |
| Si | -1.48643700 | -2.53147400 | 1.26945700  | O                    | 3.84649500  | -1.14399400 | 3.18085300  |
| O  | -2.14532700 | -3.24775600 | -0.04851400 | H                    | 4.00895600  | -1.90048800 | 3.76126300  |
| O  | -3.31042700 | -2.66603700 | -2.45874700 | O                    | 2.47698100  | -2.90678000 | 1.60390700  |
| H  | -3.76070600 | -1.83239900 | -2.21063400 | H                    | 1.53396100  | -2.89364600 | 1.85220600  |
| O  | -1.43557500 | -4.53511600 | -2.26489500 | O                    | 4.99686200  | -2.16475400 | -2.05037400 |
| H  | -1.70401400 | -4.73469100 | -3.17228800 | H                    | 5.75618300  | -2.75628500 | -2.14466700 |
| O  | -2.55479700 | -1.52247700 | 1.98741600  | O                    | 6.62916400  | -0.55176700 | -0.71650800 |
| O  | -1.02213700 | -3.58314800 | 2.42716500  | H                    | 6.89397500  | -0.19567800 | 0.14339300  |
| H  | -0.50067500 | -4.34877100 | 2.14745900  | Si                   | -1.77475200 | -3.00324400 | -1.90186100 |
| C  | 1.69878400  | 5.29266900  | -0.17564300 | Si                   | -1.28008700 | -2.50839600 | 1.02772100  |
| H  | 2.78479200  | 5.24467300  | -0.03526000 | O                    | -1.82645700 | -3.33929800 | -0.27446000 |
| H  | 1.53863100  | 5.33287900  | -1.30770000 | O                    | -3.24010800 | -2.65079900 | -2.52438200 |

|   |             |             |             |
|---|-------------|-------------|-------------|
| H | -3.71059600 | -1.84844100 | -2.21926000 |
| O | -1.19397100 | -4.34082000 | -2.64252700 |
| H | -1.45196600 | -4.44725100 | -3.56844100 |
| O | -2.52813500 | -1.80230000 | 1.82159000  |
| O | -0.41469900 | -3.47389500 | 2.04754300  |
| H | -0.51341000 | -4.42836500 | 1.91790800  |
| C | 1.18070200  | 3.21083100  | 2.57310600  |
| H | 1.28990200  | 4.06180900  | 1.79154800  |
| C | 0.92780300  | 4.56852300  | -1.59753900 |
| H | 0.67152100  | 3.86170500  | -2.42079900 |
| C | 2.21687900  | 5.32202700  | -1.93298100 |
| H | 0.07326000  | 5.25089000  | -1.50839100 |
| H | 1.88115500  | 2.38332800  | 2.45121600  |
| H | 1.46907300  | 3.78348400  | 3.45662200  |
| H | 0.15864700  | 2.85389900  | 2.70958300  |
| H | 2.14463100  | 5.84870700  | -2.89305100 |
| H | 2.44057600  | 6.06349200  | -1.16201500 |
| H | 3.07137900  | 4.64348100  | -1.99563700 |

**CA0 (V)**

|    |             |             |             |
|----|-------------|-------------|-------------|
| Si | -1.75956100 | 1.81409000  | -0.04170700 |
| O  | -0.83396500 | 3.14835400  | -0.11988000 |
| V  | 0.84468700  | 3.58180400  | -0.53510500 |
| O  | 2.12117500  | 2.39117400  | -0.78454000 |
| Si | 2.63215300  | 0.85119700  | -0.56170600 |
| O  | 4.07418700  | 0.54751900  | -1.25487200 |
| O  | 2.76219700  | 0.54805600  | 1.04700700  |
| O  | 1.50753300  | -0.18959100 | -1.17205900 |
| O  | -2.04806200 | 1.33945700  | 1.51166300  |
| O  | -3.23420300 | 2.01232700  | -0.74466100 |
| O  | -1.01021000 | 0.58182000  | -0.81139300 |
| Si | 0.00446600  | -0.70199800 | -0.85252400 |
| O  | -0.03276700 | -1.43324900 | 0.64256200  |
| O  | -0.55304300 | -1.77029600 | -1.94652700 |
| C  | 1.36294800  | 5.52077000  | -0.50860800 |
| H  | 2.40043900  | 5.63635500  | -0.18476800 |
| H  | 1.25422900  | 5.87316500  | -1.54301900 |
| H  | 0.69043500  | 6.08083800  | 0.14704000  |
| Si | -3.09721700 | 0.14703000  | 1.98861500  |
| Si | -4.54228000 | 1.03718200  | -0.51158900 |
| O  | -3.62000800 | 0.40139000  | 3.51294800  |
| H  | -3.74059500 | 1.32496100  | 3.77419400  |
| O  | -4.32457200 | 0.17881100  | 0.87188800  |
| O  | -5.85284800 | 2.01932200  | -0.47818000 |

|    |             |             |             |
|----|-------------|-------------|-------------|
| H  | -6.70397800 | 1.59585300  | -0.29621300 |
| O  | -4.65165700 | -0.10600800 | -1.71845800 |
| H  | -4.73321700 | 0.26287000  | -2.61231600 |
| Si | 3.57698000  | -0.71920600 | 1.75841700  |
| Si | 5.24564500  | -0.52750600 | -0.77953500 |
| O  | 4.75270500  | -1.13315800 | 0.67795700  |
| O  | 4.35211500  | -0.26298500 | 3.12951200  |
| H  | 3.82383900  | -0.33305100 | 3.93693400  |
| O  | 2.50213100  | -1.91264700 | 2.07851500  |
| H  | 1.62826800  | -1.79548300 | 1.65874900  |
| O  | 5.34860700  | -1.66216900 | -1.95209600 |
| H  | 6.19203100  | -2.13318100 | -1.99877500 |
| O  | 6.72172500  | 0.17629200  | -0.60558200 |
| H  | 6.92292400  | 0.50371300  | 0.28279800  |
| Si | -1.79726200 | -2.85923900 | -1.76600200 |
| Si | -1.33904400 | -2.31377800 | 1.20564500  |
| O  | -2.02288900 | -2.98933100 | -0.12345100 |
| O  | -3.18469500 | -2.40459200 | -2.49301200 |
| H  | -3.71770000 | -1.69575200 | -2.07888200 |
| O  | -1.30532900 | -4.27563000 | -2.42032300 |
| H  | -1.98750900 | -4.75571900 | -2.90954700 |
| O  | -2.38889600 | -1.31736900 | 1.95782800  |
| O  | -0.85731700 | -3.40007000 | 2.32228200  |
| H  | -0.34430500 | -4.15892500 | 2.01124400  |

**CA3 (V)**

|    |             |             |             |
|----|-------------|-------------|-------------|
| Si | -1.77086600 | 1.67722100  | -0.01264700 |
| O  | -0.84028500 | 3.00589800  | -0.06820900 |
| V  | 0.84893100  | 3.44705400  | -0.45885400 |
| O  | 2.14718400  | 2.27321700  | -0.71520400 |
| Si | 2.63910800  | 0.72468800  | -0.52329600 |
| O  | 4.07202500  | 0.41631000  | -1.23521400 |
| O  | 2.78311700  | 0.38746000  | 1.07797900  |
| O  | 1.50035500  | -0.29684100 | -1.13992000 |
| O  | -2.07289900 | 1.18215400  | 1.53264400  |
| O  | -3.24139100 | 1.88952900  | -0.72179300 |
| O  | -1.02863600 | 0.44620200  | -0.79268700 |
| Si | 0.00000500  | -0.82574100 | -0.84027600 |
| O  | -0.04398700 | -1.57757600 | 0.64498000  |
| O  | -0.53895700 | -1.88545000 | -1.95243600 |
| Si | -3.12482600 | -0.01765300 | 1.98269900  |
| Si | -4.55080900 | 0.91105600  | -0.51308300 |
| O  | -3.65450400 | 0.20797100  | 3.50952900  |
| H  | -3.78897000 | 1.12611900  | 3.78276700  |

|                                |             |             |             |    |             |             |             |
|--------------------------------|-------------|-------------|-------------|----|-------------|-------------|-------------|
| O                              | -4.34894500 | 0.03660500  | 0.86308700  | O  | -3.19197200 | 1.94816300  | -0.69297800 |
| O                              | -5.86325400 | 1.89124900  | -0.48208700 | O  | -1.01267800 | 0.45042200  | -0.85380500 |
| H                              | -6.71531200 | 1.46303500  | -0.31624200 | Si | -0.10297800 | -0.91184300 | -0.92613700 |
| O                              | -4.64718500 | -0.21869100 | -1.73412500 | O  | -0.12866100 | -1.62235900 | 0.57828400  |
| H                              | -4.71181700 | 0.16052900  | -2.62504800 | O  | -0.78851700 | -1.94098000 | -1.98375100 |
| Si                             | 3.58324400  | -0.90763900 | 1.75387700  | Si | -3.00204600 | 0.14508400  | 2.07357400  |
| Si                             | 5.22438000  | -0.69474500 | -0.79961300 | Si | -4.53972000 | 1.06383300  | -0.35770300 |
| O                              | 4.73937100  | -1.32098500 | 0.65215200  | O  | -3.42633200 | 0.45691100  | 3.61939200  |
| O                              | 4.38202100  | -0.49271900 | 3.12494800  | H  | -3.55979300 | 1.38746800  | 3.84786200  |
| H                              | 3.86229400  | -0.57462000 | 3.93679100  | O  | -4.28356100 | 0.20885500  | 1.02331700  |
| O                              | 2.49255100  | -2.08915400 | 2.06574300  | O  | -5.77902500 | 2.13006600  | -0.24690000 |
| H                              | 1.61532700  | -1.95210000 | 1.65910800  | H  | -6.64607800 | 1.76167100  | -0.02478600 |
| O                              | 5.28635700  | -1.80626300 | -1.99728500 | O  | -4.81046500 | -0.08332200 | -1.53359000 |
| H                              | 6.11666000  | -2.29806200 | -2.06177300 | H  | -4.92886200 | 0.27838500  | -2.42623800 |
| O                              | 6.71883400  | -0.02874300 | -0.63126700 | Si | 3.40550800  | -0.83789600 | 1.78329000  |
| H                              | 6.93835700  | 0.27501700  | 0.26118300  | Si | 5.14716500  | -1.02294800 | -0.70950000 |
| Si                             | -1.78580100 | -2.97516500 | -1.79770100 | O  | 4.60267600  | -1.40943500 | 0.80346400  |
| Si                             | -1.35383700 | -2.46793500 | 1.18371300  | O  | 4.14723100  | -0.19056300 | 3.09490400  |
| O                              | -2.01812300 | -3.13643600 | -0.15888500 | H  | 3.58914200  | -0.10723100 | 3.88048500  |
| O                              | -3.16932000 | -2.50480400 | -2.52262600 | O  | 2.31114500  | -1.95757500 | 2.26060400  |
| H                              | -3.70207900 | -1.79987600 | -2.10149800 | H  | 1.51012400  | -2.01228200 | 1.70593400  |
| O                              | -1.29488900 | -4.38051200 | -2.47634600 | O  | 5.21164500  | -2.30354600 | -1.72355600 |
| H                              | -1.97540600 | -4.84663600 | -2.98114200 | H  | 6.01872800  | -2.83400700 | -1.67159600 |
| O                              | -2.41786700 | -1.48189100 | 1.92915200  | O  | 6.65272000  | -0.37210400 | -0.59430300 |
| O                              | -0.88144300 | -3.56164100 | 2.29734200  | H  | 6.85121200  | 0.06995100  | 0.24361400  |
| H                              | -0.35609500 | -4.31205700 | 1.98625300  | Si | -2.08899800 | -2.94447000 | -1.72815200 |
| C                              | 1.39416300  | 5.37683300  | -0.50098600 | Si | -1.45507400 | -2.41625500 | 1.20651800  |
| H                              | 2.25701800  | 5.40479100  | 0.17863900  | O  | -2.29041700 | -2.98833400 | -0.07627000 |
| H                              | 1.77759200  | 5.46927300  | -1.52900600 | O  | -3.47712500 | -2.42915000 | -2.41478800 |
| C                              | 0.34217200  | 6.43615900  | -0.16866400 | H  | -3.97068000 | -1.71861300 | -1.95781600 |
| H                              | -0.02784600 | 6.32566900  | 0.85353700  | O  | -1.68292300 | -4.39501000 | -2.36247500 |
| H                              | 0.75569200  | 7.44744100  | -0.25959600 | H  | -2.42661700 | -4.94919300 | -2.63633200 |
| H                              | -0.51825400 | 6.37494500  | -0.83964800 | O  | -2.36693900 | -1.35745400 | 2.07028200  |
|                                |             |             |             | O  | -0.95790900 | -3.61711900 | 2.19253100  |
|                                |             |             |             | H  | -1.06392800 | -3.47064500 | 3.14251600  |
| <b>CA[3-4]<sup>#</sup> (V)</b> |             |             |             | C  | 1.72510600  | 4.41178400  | 0.64619900  |
| Si                             | -1.68794400 | 1.71426400  | -0.06224100 | H  | 1.18024000  | 4.63311100  | -1.56679900 |
| O                              | -0.73158900 | 3.01519100  | -0.21002300 | C  | 0.60388100  | 3.97288400  | -2.81913900 |
| V                              | 0.93307300  | 3.25185600  | -0.85511800 | H  | 1.45147500  | 3.54911900  | -3.36271900 |
| O                              | 2.21339400  | 2.04477600  | -1.10976100 | H  | -0.29524900 | 3.37386900  | -3.01614800 |
| Si                             | 2.59380200  | 0.49573800  | -0.75522600 | H  | 0.42004200  | 4.98385600  | -3.18627900 |
| O                              | 4.03845100  | 0.03315800  | -1.34721800 | H  | 2.72995600  | 4.71590100  | 0.33224600  |
| O                              | 2.62735100  | 0.32163300  | 0.87867900  | H  | 1.12142200  | 5.32378800  | 0.71758200  |
| O                              | 1.41649900  | -0.51145600 | -1.32566000 | C  | 1.75584500  | 3.65904900  | 1.98135600  |
| O                              | -1.92018300 | 1.26388300  | 1.50943000  |    |             |             |             |

|   |            |            |            |
|---|------------|------------|------------|
| H | 0.74885400 | 3.38156500 | 2.30719500 |
| H | 2.34979500 | 2.74255700 | 1.92625400 |
| H | 2.19197100 | 4.28142000 | 2.77383800 |

**CA0 (Ta)**

|    |             |             |             |
|----|-------------|-------------|-------------|
| Si | -1.86451000 | 1.55884300  | 0.12586400  |
| O  | -0.90760700 | 2.87588100  | 0.20919600  |
| Ta | 0.95384600  | 3.21473000  | -0.16303500 |
| O  | 2.23684100  | 1.84125900  | -0.49882200 |
| Si | 2.61314300  | 0.24734100  | -0.42710600 |
| O  | 3.99449400  | -0.11921100 | -1.20621200 |
| O  | 2.77561500  | -0.20515200 | 1.14186200  |
| O  | 1.37671500  | -0.63201300 | -1.07137400 |
| O  | -2.30683400 | 0.98414900  | 1.60226100  |
| O  | -3.25356500 | 1.82712000  | -0.70970600 |
| O  | -1.02451700 | 0.38183200  | -0.63895100 |
| Si | -0.17007800 | -1.00526900 | -0.76320000 |
| O  | -0.26707500 | -1.81220500 | 0.68976600  |
| O  | -0.84098400 | -1.94972800 | -1.90411500 |
| C  | 1.68083300  | 5.21524900  | -0.01505800 |
| H  | 2.68794700  | 5.25031000  | 0.41501500  |
| H  | 1.72379200  | 5.59892600  | -1.04752400 |
| H  | 1.01845700  | 5.86154200  | 0.57084400  |
| Si | -3.41833300 | -0.21001800 | 1.89307400  |
| Si | -4.59109800 | 0.86424800  | -0.66689400 |
| O  | -4.24763300 | 0.03426200  | 3.27572700  |
| H  | -3.87200100 | -0.35281000 | 4.07879900  |
| O  | -4.47296700 | -0.15018200 | 0.62213900  |
| O  | -5.88829200 | 1.85997000  | -0.61841800 |
| H  | -6.74240700 | 1.45012100  | -0.41965100 |
| O  | -4.62355200 | -0.14841700 | -1.98867900 |
| H  | -4.67216300 | 0.30398700  | -2.84531100 |
| Si | 3.46912500  | -1.61516800 | 1.69378600  |
| Si | 5.05948900  | -1.35202200 | -0.88530500 |
| O  | 4.54832300  | -2.04995900 | 0.52481600  |
| O  | 4.34508800  | -1.38350300 | 3.06009400  |
| H  | 3.83911400  | -1.42850400 | 3.88341000  |
| O  | 2.27118200  | -2.70421900 | 1.95142400  |
| H  | 1.40299300  | -2.43454500 | 1.59523400  |
| O  | 5.00566500  | -2.36733300 | -2.16551200 |
| H  | 5.79285700  | -2.91496800 | -2.29170200 |
| O  | 6.60608200  | -0.82444000 | -0.70430700 |
| H  | 6.86777700  | -0.60369000 | 0.20109300  |
| Si | -2.04138500 | -3.10320200 | -1.77743300 |

|    |             |             |             |
|----|-------------|-------------|-------------|
| Si | -1.60810500 | -2.66794300 | 1.20192800  |
| O  | -2.27005400 | -3.31598800 | -0.14932700 |
| O  | -3.39314000 | -2.63740400 | -2.55541300 |
| H  | -3.83071800 | -1.80084500 | -2.29475300 |
| O  | -1.54008300 | -4.53363300 | -2.39326900 |
| H  | -1.75982000 | -4.68638800 | -3.32263000 |
| O  | -2.65709400 | -1.65707800 | 1.94553100  |
| O  | -1.18447300 | -3.77509700 | 2.32238900  |
| H  | -0.70411900 | -4.55654400 | 2.01427500  |

**CA3 (Ta)**

|    |             |             |             |
|----|-------------|-------------|-------------|
| Si | -1.84711900 | 1.49698900  | 0.09723000  |
| O  | -0.85954300 | 2.78994700  | 0.16813200  |
| Ta | 1.02102400  | 3.05532200  | -0.19030000 |
| O  | 2.28648700  | 1.65801100  | -0.51491800 |
| Si | 2.60789100  | 0.05366700  | -0.43074300 |
| O  | 3.97244000  | -0.36764900 | -1.21289500 |
| O  | 2.76410700  | -0.39319800 | 1.14112900  |
| O  | 1.34098300  | -0.79167400 | -1.06184400 |
| O  | -2.30679400 | 0.94779100  | 1.57869500  |
| O  | -3.22951400 | 1.78608400  | -0.74368700 |
| O  | -1.03388100 | 0.29129400  | -0.65339200 |
| Si | -0.21579100 | -1.11904700 | -0.75310500 |
| O  | -0.33758700 | -1.90069900 | 0.71196500  |
| O  | -0.90698300 | -2.06463200 | -1.88102100 |
| Si | -3.44982800 | -0.21163800 | 1.88461000  |
| Si | -4.58929200 | 0.85616100  | -0.69218300 |
| O  | -4.27342900 | 0.07334300  | 3.26310200  |
| H  | -3.90987700 | -0.31533700 | 4.07093600  |
| O  | -4.50231600 | -0.14145200 | 0.61230900  |
| O  | -5.86268200 | 1.88320900  | -0.66455200 |
| H  | -6.72663500 | 1.49700700  | -0.46108400 |
| O  | -4.64108500 | -0.17508000 | -1.99912500 |
| H  | -4.67117400 | 0.26591800  | -2.86252300 |
| Si | 3.40672300  | -1.82470100 | 1.69839900  |
| Si | 4.99354000  | -1.63550600 | -0.88843500 |
| O  | 4.46354000  | -2.30729300 | 0.52771500  |
| O  | 4.29698400  | -1.61797600 | 3.05970400  |
| H  | 3.79275600  | -1.63745500 | 3.88509400  |
| O  | 2.16986900  | -2.86666600 | 1.96826800  |
| H  | 1.31129500  | -2.56517300 | 1.61395500  |
| O  | 4.89954600  | -2.65589100 | -2.16243000 |
| H  | 5.66372900  | -3.23628100 | -2.28359200 |
| O  | 6.55890400  | -1.16287400 | -0.71525200 |



|                                 |             |             |             |    |             |             |             |
|---------------------------------|-------------|-------------|-------------|----|-------------|-------------|-------------|
| H                               | 6.83035100  | -0.94566200 | 0.18813200  | Si | 4.99256900  | -1.48840700 | -0.79013900 |
| Si                              | -2.13376200 | -3.18819700 | -1.74106000 | O  | 4.54367700  | -2.14808200 | 0.65786100  |
| Si                              | -1.69744500 | -2.72049600 | 1.23287800  | O  | 3.75355000  | -1.55949900 | 3.19415200  |
| O                               | -2.36872400 | -3.37505400 | -0.11060400 | H  | 3.87889300  | -2.33227500 | 3.76209800  |
| O                               | -3.47402000 | -2.70167500 | -2.52637900 | O  | 2.31318000  | -3.23313700 | 1.58237400  |
| H                               | -3.89210600 | -1.85165000 | -2.27746000 | H  | 1.37258600  | -3.18683800 | 1.83550900  |
| O                               | -1.66538100 | -4.63705300 | -2.33965500 | O  | 4.87622400  | -2.51936400 | -2.05540800 |
| H                               | -1.89975400 | -4.79994800 | -3.26369000 | H  | 5.61707200  | -3.13203400 | -2.16095400 |
| O                               | -2.72803900 | -1.67806100 | 1.95834100  | O  | 6.55581900  | -0.98739100 | -0.68497400 |
| O                               | -1.29935000 | -3.81840900 | 2.37176100  | H  | 6.82991800  | -0.65823300 | 0.18272400  |
| H                               | -0.81614700 | -4.60467800 | 2.08078900  | Si | -1.92301200 | -3.14180800 | -1.91719800 |
| C                               | 1.86952600  | 5.00734100  | -0.10769400 | Si | -1.43129800 | -2.69437400 | 1.02142900  |
| H                               | 2.72275500  | 4.90058600  | 0.58225700  | O  | -2.00117100 | -3.48880600 | -0.29334000 |
| H                               | 2.29991000  | 5.09963100  | -1.12231200 | O  | -3.37030900 | -2.73600400 | -2.54910200 |
| C                               | 1.00606700  | 6.22867200  | 0.24482900  | H  | -3.82148000 | -1.92627900 | -2.23457400 |
| H                               | 0.59457800  | 6.14741100  | 1.25399400  | O  | -1.37937900 | -4.49082500 | -2.66494300 |
| H                               | 1.58831100  | 7.15498100  | 0.20202900  | H  | -1.63374500 | -4.58217100 | -3.59347500 |
| H                               | 0.16660400  | 6.34008100  | -0.44661200 | O  | -2.65803000 | -1.95461500 | 1.81789400  |
|                                 |             |             |             | O  | -0.60253000 | -3.70036800 | 2.03183600  |
|                                 |             |             |             | H  | -0.73998100 | -4.64951700 | 1.89872400  |
| <b>CA[3-4]<sup>#</sup> (Ta)</b> |             |             |             | C  | 1.26808500  | 3.28333300  | 2.43328900  |
| Si                              | -2.03503200 | 1.49998100  | 0.11888600  | H  | 1.38834700  | 4.07998300  | 1.46458900  |
| O                               | -1.13240600 | 2.83382500  | 0.32498300  | C  | 0.84036200  | 3.91854400  | -1.82405700 |
| Ta                              | 0.83244700  | 2.92708100  | 0.09014900  | H  | 0.50758600  | 3.07560100  | -2.47061300 |
| O                               | 2.40744300  | 1.81288900  | -0.18655300 | C  | 2.12165300  | 4.53776000  | -2.39408100 |
| Si                              | 2.54695900  | 0.18909300  | -0.36144400 | H  | 0.01580000  | 4.64079700  | -1.82934200 |
| O                               | 3.93691800  | -0.24901000 | -1.09148800 | H  | 1.92772600  | 2.41026100  | 2.46840900  |
| O                               | 2.52277600  | -0.51335700 | 1.12496500  | H  | 1.64312200  | 4.01660400  | 3.15034400  |
| O                               | 1.25741300  | -0.36891000 | -1.23034000 | H  | 0.24420700  | 3.02341900  | 2.71755200  |
| O                               | -2.29812300 | 0.72936900  | 1.55923600  | H  | 1.98467200  | 4.86738500  | -3.43128600 |
| O                               | -3.53206800 | 1.77489600  | -0.51601600 | H  | 2.42576200  | 5.40722800  | -1.80635500 |
| O                               | -1.28395600 | 0.46052300  | -0.91309800 | H  | 2.95071500  | 3.82607500  | -2.38222200 |
| Si                              | -0.27331800 | -0.83493200 | -0.95199700 |    |             |             |             |
| O                               | -0.35321200 | -1.56078000 | 0.52597200  |    |             |             |             |
| O                               | -0.83428000 | -1.88748200 | -2.06365500 |    |             |             |             |
| Si                              | -3.36653800 | -0.48535200 | 1.90803600  |    |             |             |             |
| Si                              | -4.75640100 | 0.67299800  | -0.51387200 |    |             |             |             |
| O                               | -3.95375500 | -0.35975900 | 3.42663500  |    |             |             |             |
| H                               | -4.26903200 | 0.51357500  | 3.69762300  |    |             |             |             |
| O                               | -4.55083700 | -0.35825100 | 0.75156600  |    |             |             |             |
| O                               | -6.15122100 | 1.52761000  | -0.43809400 |    |             |             |             |
| H                               | -6.97172400 | 1.01434200  | -0.43409900 |    |             |             |             |
| O                               | -4.68531300 | -0.29807400 | -1.86760700 |    |             |             |             |
| H                               | -4.65524900 | 0.18790100  | -2.70687700 |    |             |             |             |
| Si                              | 3.25409700  | -1.89675500 | 1.66184100  |    |             |             |             |
